# Supplementary material for: Exploration of ω-side chain addition strategies for the syntheses of isocarbacyclin and 15R-16-(m-tolyl)-17,18,19,20-tetranorisocarbacyclin
Source: Royal Society of Chemistry journal article supplement (doi:10.1039/b611339g), 2006-01-01

**Exploration of  $\omega$ -Side Chain Addition Strategies for the Syntheses of  
Isocarbacyclin and 15*R*-16-(*m*-tolyl)-17,18,19,20-tetranorisocarbacyclin**  
**Supporting Information**

Neil A. Sheddan\* and Johann Mulzer\*

Institut für Organische Chemie, Währingerstrasse 38, A-1090 Wien, Austria

### General Experimental

All reactions were carried out in oven or flame-dried glassware under an argon atmosphere, unless otherwise stated. Anhydrous tetrahydrofuran (THF) and diethyl ether (Et<sub>2</sub>O) were freshly distilled from sodium / benzophenone under argon. All other solvents were HPLC grade. Reactions were magnetically stirred and monitored by thin layer chromatography (TLC) with E. Merck silica gel 60-F254 plates. Flash column chromatography was performed with Merck silica gel (0.04-0.63  $\mu$ m, 240-400 mesh) under high pressure. Yields refer to chromatographically and spectroscopically pure compounds, unless otherwise stated. NMR spectra were recorded on either a Bruker Avance DPX 400 MHz or 600 MHz spectrometer. Unless otherwise stated, all NMR spectra were measured in CDCl<sub>3</sub> solutions and referenced to the residual CHCl<sub>3</sub> signal (<sup>1</sup>H,  $\delta$  = 7.26; <sup>13</sup>C,  $\delta$  = 77.0). All <sup>1</sup>H and <sup>13</sup>C NMR shifts are given in ppm (for <sup>1</sup>H NMR: s = singlet, d = doublet, t = triplet, q = quadruplet, m = multiplet; br s = broad signal; for <sup>13</sup>C NMR: p = primary, s = secondary, t = tertiary, q = quaternary). Coupling constants *J* are given in Hz; assignments of proton resonances were confirmed, when possible, by selective homonuclear decoupling experiments or by correlated spectroscopy.

**(E)-3-((1R,2R,3aS,6aS)-2-(tert-butyldimethylsilyloxy)-5-(5-(4-methoxybenzyloxy)pentyl)-1,2,3,3a,6,6a-hexahydropentalen-1-yl)-N-methoxy-N-methylacrylamide, 7**

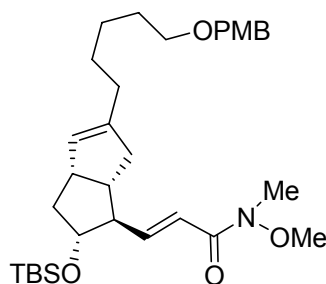

**7**

A suspension of NaH (0.043 g, 1.08 mmol) in anhydrous THF (5 mL) was stirred for 30 minutes at 0 °C. Diethyl 2-(methoxy(methyl)amino)-2-oxoethylphosphonate (0.258 g, 1.08 mmol) in anhydrous THF (4 mL) was added dropwise and the solution was stirred for a further 45 minutes at 0 °C. (1R,2R,3aS,6aS)-2-(tert-butyldimethylsilyloxy)-5-(5-(4-methoxybenzyloxy)pentyl)-1,2,3,3a,6,6a-hexahydropentalene-1-carbaldehyde, **9** (0.300 g, 0.635 mmol) in anhydrous THF (5 mL) was then added and allowed to stir overnight warming to ambient temperature. The reaction was quenched by the addition of saturated aq. NH<sub>4</sub>Cl solution (10 mL) and was extracted with Et<sub>2</sub>O (5 x 10 mL). Combined organic layers were washed with H<sub>2</sub>O (1 x 10 mL), dried over MgSO<sub>4</sub>, filtered and concentrated *in vacuo*. Crude product was purified by flash column chromatography using hexanes:ethyl (3:1) as the mobile phase to afford (E)-3-((1R,2R,3aS,6aS)-2-(tert-butyldimethylsilyloxy)-5-(5-(4-methoxybenzyloxy)pentyl)-1,2,3,3a,6,6a-hexahydropentalen-1-yl)-N-methoxy-N-methylacrylamide, **7**, as a pale yellow oil (0.307 g, 87 %).

**C<sub>32</sub>H<sub>51</sub>NO<sub>5</sub>Si**      **M<sub>r</sub> = 557.84**

**<sup>1</sup>H NMR** (400 MHz, CDCl<sub>3</sub>) 7.25 (2H, d, *J* 8.3, ArH), 6.87 (2H, d, *J* 8.8, ArH), 6.45 (1H, dd, *J* 15.1, 9.2, vinylic in chain), 6.45 (1H, d, *J* 15.1, vinylic in chain), 5.25 (1H, s, vinylic in ring), 4.42 (2H, s, CH<sub>2</sub>Ar), 3.87 (1H, ddd, *J* 9.3, 9.3, 7.1, CHOTBS), 3.80 (3H, s, ArOCH<sub>3</sub>), 3.68 (3H, s, NOCH<sub>3</sub>), 3.43 (2H, dd, *J* 6.8, 6.6, alkyl CH<sub>2</sub>), 3.24 (3H, s, NCH<sub>3</sub>), 3.00 (1H, d, *J* 7.6, CHCH<sub>2</sub>CHOTBS), 2.47-2.35 (2H, m, (2H, m, CHHCHCHCHOTBS), 2.29-2.16 (2H, m, CHHCHOTBS, CHCHOTBS), 2.05-1.92 (3H, m, alkyl CH<sub>2</sub>, CHHCHCHCHOTBS), 1.60 (2H, dddd, *J* 7.3, 7.1, 6.8, 6.8, alkyl CH<sub>2</sub>), 1.48-1.23 (5H, m, 2 x alkyl CH<sub>2</sub>, CHHCHOTBS), 0.84 (9H, s, SiC(CH<sub>3</sub>)<sub>3</sub>), 0.01 (3H, s, SiCH<sub>3</sub>), 0.00 (3H, s, SiCH<sub>3</sub>)

<sup>13</sup>C-NMR (100 MHz, CDCl<sub>3</sub>) 166.8 (q), 159.1 (q), 149.2 (t), 141.7 (q), 130.8 (q), 129.2 (t), 127.7 (t), 119.6 (t), 113.7 (t), 77.8 (t), 72.5 (s), 70.1 (s), 61.6 (p), 58.1 (t), 55.2 (p), 45.7 (t), 43.5 (t), 41.0 (s), 39.9 (s), 32.4 (p), 30.9 (s), 29.6 (s), 27.6 (s), 26.1 (s), 25.8 (p), 18.0 (q), -4.6 (p), -4.6 (p)

IR (Si, Film)  $\tilde{\nu}_{\max}$  = 2932, 2856, 1665, 1636, 1614, 1586, 1513, 1463, 1443, 1383, 1037, 863

HRMS (200 °C 70 eV): *m/z* calcd for C<sub>28</sub>O<sub>42</sub>O<sub>5</sub>NSi (M<sup>+</sup> - C<sub>4</sub>H<sub>9</sub>): 500.2582; found 500.2583

Optical Rotation:  $[\alpha]_{\text{D}}^{20} = -2.7$  (c = 0.93, CHCl<sub>3</sub>)

*R<sub>f</sub>* (3:1 Hex/EtOAc) = 0.23

**(E)-3-((1R,2R,3aS,6aS)-2-(tert-butyldimethylsilyloxy)-5-(5-(4-methoxybenzyloxy)pentyl)-1,2,3,3a,6,6a-hexahydropentalen-1-yl)acrylaldehyde, 8**

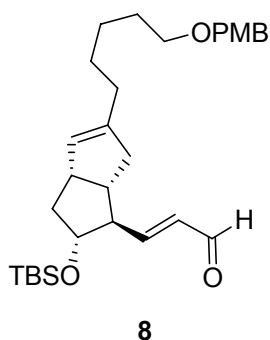

A solution of (E)-3-((1R,2R,3aS,6aS)-2-(tert-butyldimethylsilyloxy)-5-(5-(4-methoxybenzyloxy)pentyl)-1,2,3,3a,6,6a-hexahydropentalen-1-yl)-N-methoxy-N-methylacrylamide, **7**, in anhydrous THF (5 mL) was stirred at -78 °C for 40 minutes. DIBAL-H (1.5 M, toluene, 0.86 mL, 3 eq.) was added dropwise and stirred at this temperature for 1.5 hours. The reaction was quenched by the addition of saturated aq. NH<sub>4</sub>Cl solution (10 mL) where a Na/K-tartrate solution (20 mL) was added and allowed to warm to ambient temperature overnight. Extraction was carried out with CH<sub>2</sub>Cl<sub>2</sub> (5 x 10 mL) and the combined organic layers were washed with H<sub>2</sub>O (1 x 15 mL), dried over MgSO<sub>4</sub>, filtered and concentrated *in vacuo*. Crude product was purified by flash column chromatography using hexanes:ethyl (5:1) as the mobile phase to afford (E)-3-((1R,2R,3aS,6aS)-2-(tert-butyldimethylsilyloxy)-5-(5-(4-methoxybenzyloxy)pentyl)-1,2,3,3a,6,6a-hexahydropentalen-1-yl)acrylaldehyde, **8**, as a pale yellow oil (0.213 g, 100 %).

$C_{30}H_{46}O_4Si$

$M_r = 498.77$

$^1H$  NMR (400 MHz,  $CDCl_3$ ) 9.53 (1H, d,  $J$  7.8, CHO), 7.26 (2H, d,  $J$  8.6, ArH), 6.87 (2H, d,  $J$  8.6, ArH), 6.77 (1H, dd,  $J$  15.7, 7.8, vinylic in chain), 6.17 (1H, ddd,  $J$  15.7, 7.8, 0.7, vinylic in chain), 5.27 (1H, d,  $J$  1.3, vinylic in ring), 4.43 (2H, s,  $CH_2Ar$ ), 3.87 (1H, ddd,  $J$  9.3, 9.3, 7.1, CHOTBS), 3.80 (3H, s,  $OCH_3$ ), 3.43 (2H, dd,  $J$  6.8, 6.6, alkyl  $CH_2$ ), 3.09-2.99 (1H, m,  $CHCH_2CHOTBS$ ), 2.51-2.31 (3H, m,  $CHHCHCHCHOTBS$ ), 2.26 (1H, ddd,  $J$  12.3, 8.8, 7.0,  $CHHCHOTBS$ ), 2.05-1.93 (3H, m, alkyl  $CH_2$ ,  $CHHCHCHCHOTBS$ ), 1.61 (2H, dddd,  $J$  7.3, 7.1, 6.8, 6.8, alkyl  $CH_2$ ), 1.49-1.23 (5H, m, 2 x alkyl  $CH_2$ ,  $CHHCHOTBS$ ), 0.85 (9H, s,  $Si(CH_3)_3$ ), 0.02 (3H, s,  $SiCH_3$ ), 0.00 (3H, s,  $SiCH_3$ )

$^{13}C$ -NMR (100 MHz,  $CDCl_3$ ) 193.9 (t), 160.0 (t), 159.1 (q), 141.8 (q), 133.5 (t), 130.8 (q), 129.2 (t), 127.5 (t), 113.8 (t), 77.5 (t), 72.5 (s), 70.1 (s), 58.1 (t), 55.3 (p), 45.8 (t), 43.1 (t), 41.0 (s), 39.9 (s), 30.9 (s), 29.6 (s), 27.6 (s), 26.1 (s), 25.7 (p), 18.0 (q), -4.4 (p), -4.7 (p)

IR (Si, Film)  $\tilde{\nu}_{max} = 2928, 2856, 1691, 1653, 1616, 1559, 1513, 1457, 1362, 1249, 1113, 863$

HRMS (150 °C 70 eV):  $m/z$  calcd for  $C_{30}H_{46}O_4Si$ : 498.3165; found 498.3151

Optical Rotation:  $[\alpha]_D^{20} = +13.5$  ( $c = 0.24$ ,  $CHCl_3$ )

$R_f$  (5:1 Hex/EtOAc) = 0.35

**(E)-1-((1R,2R,3aS,6aS)-2-(tert-butyldimethylsilyloxy)-5-(5-(4-methoxybenzyloxy)pentyl)-1,2,3,3a,6,6a-hexahdropentalen-1-yl)oct-1-en-3-one, 13**

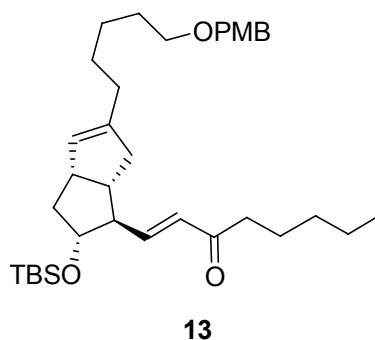

To the solution of (E)-3-((1R,2R,3aS,6aS)-2-(tert-butyldimethylsilyloxy)-5-(5-(4-methoxybenzyloxy)pentyl)-1,2,3,3a,6,6a-hexahdropentalen-1-yl)-N-methoxy-N-

methylacrylamide, **7**, (0.416 g, 0.746 mmol) in anhydrous THF (25 mL) at -78 °C was added pentyl magnesium bromide (2.0 M, 1.12 mL, 2.24 mmol). The solution was stirred at -78 °C for 1 hour and allowed to warm to 0 °C. H<sub>2</sub>O (10 mL) was added and extracted with CH<sub>2</sub>Cl<sub>2</sub> (5 x 10 mL) and the combined organic layers were washed with H<sub>2</sub>O (1 x 15 mL), dried over MgSO<sub>4</sub>, filtered and concentrated *in vacuo*. Crude product was purified by flash column chromatography using using hexanes:ethyl (10:1) as the mobile phase to afford (*E*)-1-((1*R*,2*R*,3*aS*,6*aS*)-2-(*tert*-butyldimethylsilyloxy)-5-(5-(4-methoxybenzyloxy)pentyl)-1,2,3,3*a*,6,6*a*-hexahydropentalen-1-yl)oct-1-en-3-one, **13**, as a clear oil (0.398 g, 94 %).

**C<sub>35</sub>H<sub>56</sub>O<sub>4</sub>Si**                      **M<sub>r</sub> = 568.90**

**<sup>1</sup>H NMR** (400 MHz, CDCl<sub>3</sub>) 7.26 (2H, d, *J* 8.8, Ar*H*), 6.87 (2H, d, *J* 8.6, Ar*H*), 6.73 (1H, dd *J* 15.8, 8.2, vinylic in chain), 6.14 (1H, dd, *J* 15.8, 1.0, vinylic in chain), 5.25 (1H, d *J* 1.3, vinylic in ring), 4.43 (2H, s, CH<sub>2</sub>Ar), 3.84 (1H, ddd, *J* 9.6, 9.6, 7.1, CHOTBS), 3.80 (3H, s, OCH<sub>3</sub>), 3.43 (2H, dd, *J* 6.8, 6.6, alkyl CH<sub>2</sub>), 3.01 (1H, ddd, *J* 8.8, 8.3, 7.8, CHCH<sub>2</sub>CHOTBS), 2.52 (2H, dd, *J* 7.6, 7.3, O=CCH<sub>2</sub>), 2.48 (2H, m, CHHCHCHOTBS), 2.24 (1H, ddd, *J* 12.2, 8.8, 7.0, CHHCHOTBS), 2.16 (1H, ddd, *J* 9.3, 8.8, 8.6, TBSOCHCH), 2.05-1.91 (3H, m, CHHCHCHOTBS, alkyl CH<sub>2</sub>), 1.67-1.55 (4H, m, 2 x CH<sub>2</sub>), 1.48-1.22 (9H, m, CHHCHOTBS, 4 x alkyl CH<sub>2</sub>), 0.89 (3H, dd, *J* 7.1, 6.8, CH<sub>3</sub>), 0.85 (9H, s, SiC(CH<sub>3</sub>)<sub>3</sub>), 0.01 (3H, s, SiCH<sub>3</sub>), 0.00 (3H, s, SiCH<sub>3</sub>)

**<sup>13</sup>C-NMR** (100 MHz, CDCl<sub>3</sub>) 200.6 (q), 159.1 (q), 148.4 (t), 141.8 (q), 130.9 (t), 130.8 (q), 129.2 (t), 127.6 (t), 113.7 (t), 77.5 (t), 72.5 (s), 70.1 (s), 57.8 (t), 55.3 (p), 45.7 (t), 43.1 (t), 40.9 (s), 40.1 (s), 39.9 (s), 31.5 (s), 30.9 (s), 29.6 (s), 27.6 (s), 26.1 (s), 25.7 (p), 24.0 (s), 22.5 (s), 18.0 (q), 13.9 (p), -4.5 (p), -4.7 (p)

**IR** (Si, Film)  $\tilde{\nu}_{\max}$  = 2929, 2857, 1735, 1696, 1672, 1586, 1560, 1513, 1463, 1361, 1248, 980

**HRMS** (150 °C 70 eV): *m/z* calcd for C<sub>31</sub>O<sub>47</sub>O<sub>4</sub>Si (M<sup>+</sup> - C<sub>4</sub>H<sub>9</sub>): 511.3244; found 511.3233

**Optical Rotation:**  $[\alpha]_{\text{D}}^{20} = +1.3$  (c = 0.69, CHCl<sub>3</sub>)

**R<sub>f</sub>** (5:1 Hex/EtOAc) = 0.34

**(E)-4-((1R,2R,3aS,6aS)-2-(tert-butyldimethylsilyloxy)-5-(5-(4-methoxybenzyloxy)pentyl)-1,2,3,3a,6,6a-hexahydropentalen-1-yl)-1-m-tolylbut-3-en-2-one, 14**

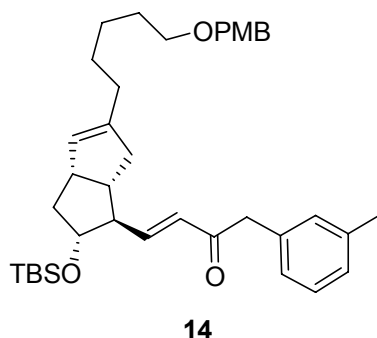

To the solution of (E)-3-((1R,2R,3aS,6aS)-2-(tert-butyldimethylsilyloxy)-5-(5-(4-methoxybenzyloxy)pentyl)-1,2,3,3a,6,6a-hexahydropentalen-1-yl)-N-methoxy-N-methylacrylamide, **7**, (0.100 g, 0.180 mmol) in anhydrous THF (2 mL) at -78 °C was added (3-methylbenzyl)magnesium bromide (0.74 M, 0.730 mL, 0.54 mmol). The solution was stirred at -78°C for 1 hour and allowed to warm to 0 °C. H<sub>2</sub>O (2 mL) was added and extracted with CH<sub>2</sub>Cl<sub>2</sub> (5 x 2 mL) and the combined organic layers were washed with H<sub>2</sub>O (1 x 2 mL), dried over MgSO<sub>4</sub>, filtered and concentrated *in vacuo*. Crude product was purified by flash column chromatography using hexanes:ethyl (10:1) as the mobile phase to afford (E)-4-((1R,2R,3aS,6aS)-2-(tert-butyldimethylsilyloxy)-5-(5-(4-methoxybenzyloxy)pentyl)-1,2,3,3a,6,6a-hexahydropentalen-1-yl)-1-m-tolylbut-3-en-2-one, **14**, as a clear oil (0.098 g, 90 %).

**C<sub>38</sub>H<sub>54</sub>O<sub>4</sub>Si**      **M<sub>r</sub> = 602.92**

**<sup>1</sup>H NMR** (400 MHz, CDCl<sub>3</sub>) 7.26 (2H, d, *J* 8.6, ArH), 7.20 (1H, t, *J* 7.6, ArH), 7.05 (1H, d, *J* 7.6, ArH), 7.03-6.97 (2H, m, ArH), 6.88 (2H, d, *J* 8.8, ArH), 6.82 (1H, dd *J* 15.7, 8.6, vinylic in chain), 6.20 (1H, dd, *J* 15.7, 0.8, vinylic in chain), 5.24 (1H, s, vinylic in ring), 4.43 (2H, s, CH<sub>2</sub>Ar), 3.82 (1H, overlapping ddd, *J* 9.6, 9.6, 7.1, CHOTBS), 3.80 (3H, s, OCH<sub>3</sub>), 3.78 (2H, bs, O=CCH<sub>2</sub>), 3.44 (2H, dd, *J* 6.8, 6.6, alkyl CH<sub>2</sub>), 3.05-2.95 (1H, m, CHCH<sub>2</sub>CHOTBS), 2.46-2.28 (2H, CHHCHCHOTBS), 2.33 (3H, s, ArCH<sub>3</sub>), 2.22 (1H, ddd, *J* 12.3, 8.7, 7.1, CHHCHOTBS), 2.14 (1H, ddd, *J* 9.3, 9.1, 9.1, TBSOCHCH), 1.99 (2H, dd, *J* 7.3, 6.6, alkyl CH<sub>2</sub>), 1.91 (1H, d, *J* 15.2, CHHCHCHOTBS), 1.60 (2H, dddd, 7.3, 7.1, 6.8, 6.8, alkyl CH<sub>2</sub>), 1.47-1.16 (5H, m, 2 x alkyl CH<sub>2</sub>, CHHCHOTBS), 0.82 (9H, s, SiC(CH<sub>3</sub>)<sub>3</sub>), -0.02 (3H, s, SiCH<sub>3</sub>), -0.06 (3H, s, SiCH<sub>3</sub>)

<sup>13</sup>C-NMR (100 MHz, CDCl<sub>3</sub>) 197.3 (q), 159.1 (q), 149.6 (t), 141.8 (q), 138.2 (q), 134.4 (q), 130.8 (q), 130.2 (t), 130.0 (t), 129.2 (t), 128.5 (t), 127.6 (t), 127.6 (t), 126.5 (t), 113.7 (t), 77.5 (t), 72.5 (s), 70.1 (s), 57.9 (t), 55.3 (p), 47.6 (s), 45.8 (t), 43.2 (t), 41.0 (s), 39.9 (s), 30.9 (s), 29.7 (s), 27.6 (s), 26.1 (s), 25.7 (p), 21.3 (p), 18.0 (q), -4.6 (p), -4.8 (p)

IR (Si, Film)  $\tilde{\nu}_{\max}$  = 2928, 2856, 1699, 1607, 1513, 1463, 1361, 1257, 1169, 1113, 1035, 836

HRMS (170 °C 70 eV): *m/z* calcd for C<sub>38</sub>H<sub>54</sub>O<sub>4</sub>Si: 602.3791; found 602.3777

Optical Rotation:  $[\alpha]_{\text{D}}^{20}$  = + 9.6 (c = 0.19, CHCl<sub>3</sub>)

*R<sub>f</sub>* (3:1 Hex/EtOAc) = 0.44

**(S,E)-1-((1R,2R,3aS,6aS)-2-(tert-butyldimethylsilyloxy)-5-(5-(4-methoxybenzyloxy)pentyl)-1,2,3,3a,6,6a-hexahydropentalen-1-yl)oct-1-en-3-ol, 21**

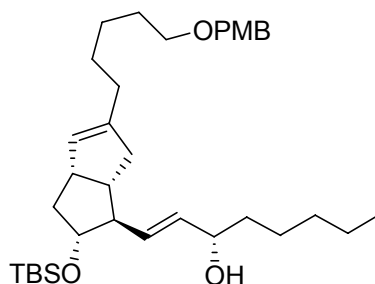

**21**

**Method 1: (R)-CBS Reduction**

(E)-1-((1R,2R,3aS,6aS)-2-(tert-butyldimethylsilyloxy)-5-(5-(4-methoxybenzyloxy)pentyl)-1,2,3,3a,6,6a-hexahydropentalen-1-yl)oct-1-en-3-one, **13** (0.199 g, 0.350 mmol) and (R)-2-methyl-CBS-oxazaborolidine\* (1.0 M in toluene, 0.18 mL, 0.180 mmol) in toluene (3 mL) was stirred at -78 °C for 30 minutes. Catecholborane (1.0 M in toluene, 1.4 mL, 1.40 mmol) was added dropwise, via syringe pump, over 6 hours. The reaction was stirred at -78 °C for 14 h at which time methanol (3 mL) was added to quench the remaining hydride. The reaction was warmed to ambient temperature, extracted with Et<sub>2</sub>O (5 x 4 mL) and combined organic layers were washed with NaOH (1 M, 5 mL), and brine (5 mL), dried over MgSO<sub>4</sub>, filtered and concentrated *in vacuo*. Crude product was purified by flash column chromatography using hexanes:ethyl (10:1) as the mobile phase to afford a 9:1 mixture of (S,E)-1-

((1*R*,2*R*,3*aS*,6*aS*)-2-(*tert*-butyldimethylsilyloxy)-5-(5-(4-methoxybenzyloxy)pentyl)-1,2,3,3*a*,6,6*a*-hexahydropentalen-1-yl)oct-1-en-3-ol and (*R,E*)-1-((1*R*,2*R*,3*aS*,6*aS*)-2-(*tert*-butyldimethylsilyloxy)-5-(5-(4-methoxybenzyloxy)pentyl)-1,2,3,3*a*,6,6*a*-hexahydropentalen-1-yl)oct-1-en-3-ol, respectively, as a clear oil (0.191 g, 96 %).

\* Same procedure was followed, when using the (*R*)-2-*n*-butyl-CBS-oxazaborolidine as catalyst to afford a 10:1 mixture of (*S,E*)-1-((1*R*,2*R*,3*aS*,6*aS*)-2-(*tert*-butyldimethylsilyloxy)-5-(5-(4-methoxybenzyloxy)pentyl)-1,2,3,3*a*,6,6*a*-hexahydropentalen-1-yl)oct-1-en-3-ol and (*R,E*)-1-((1*R*,2*R*,3*aS*,6*aS*)-2-(*tert*-butyldimethylsilyloxy)-5-(5-(4-methoxybenzyloxy)pentyl)-1,2,3,3*a*,6,6*a*-hexahydropentalen-1-yl)oct-1-en-3-ol, respectively (92%).

#### Method 2: (*S*)-BINAL-H Reduction

A dry Schlenk flask equipped with a rubber septum was flame-dried and placed under an argon atmosphere. A solution of LiAlH<sub>4</sub> (1M in THF, 0.704 mL, 0.704 mmol, 4 equiv) was added via syringe at room temperature, then a solution of absolute EtOH (0.032 g, 0.704 mmol, 4 equiv) in dry THF (0.5 mL) was added dropwise via cannula over a period of *ca.* 10 min with stirring. Subsequently a THF solution of *bis*(*S*)-naphthol (0.202 g, 0.704 mmol, 4 equiv in 1.5 mL of dry THF) was added dropwise, and the resulting mixture was stirred for an additional 30 min at rt and used for the asymmetric reduction. The (*S*)-BINAL-H reagent thus formed in THF was a homogeneous, milky mixture, which did not separate any precipitate; this mixture was cooled to -100°C and a solution of (*E*)-1-((1*R*,2*R*,3*aS*,6*aS*)-2-(*tert*-butyldimethylsilyloxy)-5-(5-(4-methoxybenzyloxy)pentyl)-1,2,3,3*a*,6,6*a*-hexahydropentalen-1-yl)oct-1-en-3-one, **13**, (0.100 g, 0.176 mmol, 1.0 equiv) in dry THF (2 mL) was added dropwise via cannula. After stirring for 2 h at the same temperature, the asymmetric reduction was completed. Excess BINAL-H was destroyed by addition of methanol (0.2 mL) at -78°C and the mixture, followed by KHSO<sub>4</sub> (5% in water, 0.5 mL) and was warmed to r.t. Et<sub>2</sub>O (3 mL) were added; extracted with Et<sub>2</sub>O (5 x 1 mL) where combined organic layers were washed with water (1 x 1 mL) and brine (1 x 2 mL), dried over MgSO<sub>4</sub>, filtered and concentrated *in vacuo*. Crude product was purified by flash column chromatography using using hexanes:ethyl (10:1) as the mobile phase to afford (*S,E*)-1-((1*R*,2*R*,3*aS*,6*aS*)-2-(*tert*-butyldimethylsilyloxy)-5-(5-(4-methoxybenzyloxy)pentyl)-1,2,3,3*a*,6,6*a*-hexahydropentalen-1-yl)oct-1-en-3-ol as a clear oil (0.91 g, 91 %).



### Method 3: Seebach's Alkylation Method

Catalysts **17**, **18** and **19** were prepared, as described by J. L. von der Bussche-Hünnefeld, D. Seebach, *Tetrahedron*, **1992**, *48*, 5719.

A 1.0 M zinc chloride solution in Et<sub>2</sub>O (20 mL, 20.00 mmol) was diluted with Et<sub>2</sub>O (10 mL) and pentyl magnesium bromide (2.0 M in Et<sub>2</sub>O, 19.1 mL, 40 mmol) was then added dropwise. The resulting suspension was stirred at room temperature for 2 h. then treated with 3.6 mL of 1,4-dioxane (freshly distilled from sodium metal) and stirred for an additional 45 minutes. Subsequent filtration under an argon atmosphere (Schlenk filter) yielded a clear 0.41 M solution of dipentyl zinc reagent **20**. An aliquot of the dipentyl zinc solution (0.49 mL, 0.20 mmol) was then added to a previously prepared solution of 0.02 g of spiroitanate **17** (0.02 mmol) (or 2.0 mmol of **18** or **19**), followed by Ti(OCHMe<sub>2</sub>)<sub>4</sub> (0.031 mL, 0.12 mmol) in toluene (0.5 mL). The mixture was stirred at -78 °C for 1 h., where a solution of (*E*)-3-((1*R*,2*R*,3*aS*,6*aS*)-2-(*tert*-butyldimethylsilyloxy)-5-(5-(4-methoxybenzyloxy)pentyl)-1,2,3,3*a*,6,6*a*-hexahydropentalen-1-yl)acrylaldehyde, **8**, (0.05 g, 0.10 mmol) in toluene (0.5 mL) was added dropwise, and the reaction temperature raised to -30 °C. The reaction was kept at this temperature for a further 14 hours where it was quenched by the addition of a saturated solution of NH<sub>4</sub>Cl (1 mL) and Et<sub>2</sub>O (3 mL), extracted with Et<sub>2</sub>O (5 x 1 mL) where combined organic layers were washed with water (1 x 1 mL) and brine (1 x 2 mL), dried over MgSO<sub>4</sub>, filtered and concentrated *in vacuo*. Pentane was added to the resulting oil to recover the diol ligand. Crude product was purified by flash column chromatography using using hexanes:ethyl (10:1) as the mobile phase to afford (*S,E*)-1-((1*R*,2*R*,3*aS*,6*aS*)-2-(*tert*-butyldimethylsilyloxy)-5-(5-(4-methoxybenzyloxy)pentyl)-1,2,3,3*a*,6,6*a*-hexahydropentalen-1-yl)oct-1-en-3-ol, **21** as a clear oil (0.047 g, 82 %).

**C<sub>35</sub>H<sub>58</sub>O<sub>4</sub>Si**

**M<sub>r</sub> = 570.92**

**<sup>1</sup>H NMR** (400 MHz, CDCl<sub>3</sub>) 7.26 (2H, d, *J* 8.6, *ArH*), 6.88 (2H, d, *J* 8.6, *ArH*), 5.59-5.48 (1H, overlapping dd, *J* 15.4, 4.3, *HC=CH*), 5.59-5.48 (1H, overlapping dd, *J* 15.4, 5.3, *HC=CH*), 5.24 (1H, d, *J* 1.3, vinylic in ring), 4.43 (2H, s, *OCH<sub>2</sub>Ar*), 4.10-4.03 (1H, m, *HC=CHCHOH*), 3.80 (3H, s, *ArOCH<sub>3</sub>*), 3.73 (1H, ddd, *J* 9.8, 9.5, 6.8, *CHOTBS*), 3.43 (2H, dd, *J* 6.8, 6.6, , alkyl *CH<sub>2</sub>*), 2.94 (1H, dddd, *J* 8.6, 8.6, 8.5, 1.8, *CHCH<sub>2</sub>CHOTBS*), 2.40 (1H, dd, *J* 16.6, 9.0, *HC=CCHH*), 2.25 (1H, dddd, *J* 9.5, 9.5, 8.9, 1.8, , *HCHCHC=CH*), 2.18 (1H,

ddd,  $J$  12.2, 8.8, 7.0,  $CHHCHOTBS$ ), 2.04-1.93 (4H, m,  $HCHC=CH$ ,  $HC=CCHH$ , alkyl  $CH_2$ ), 1.61 (2H, dddd,  $J$  7.3, 7.1, 6.8, 6.8, alkyl  $CH_2$ ), 1.59-1.57 (1H, m, OH), 1.56-1.24 (15H, m, 7 x alkyl  $CH_2$ ,  $CHHCHOTBS$ ), 0.93-0.84 (3H, m, alkyl  $CH_3$ ), 0.86 (9H, s,  $SiC(CH_3)_3$ ), 0.02 (6H, s,  $Si(CH_3)_2$ )

$^{13}C$ -NMR (100 MHz,  $CDCl_3$ ) 159.1 (q), 141.8 (q), 134.1 (t), 133.1 (t), 130.8 (q), 129.2 (t), 127.8 (t), 113.8 (t), 77.8 (t), 73.1 (t), 72.5 (s), 70.1 (s), 57.3 (t), 55.3 (p), 45.4 (t), 43.2 (t), 40.7 (s), 39.9 (s), 37.3 (s), 31.8 (s), 31.0 (s), 29.6 (s), 27.6 (s), 26.1 (s), 25.9 (p), 25.3 (p), 22.6 (s), 18.1 (q), 14.0 (p), -4.4 (p), -4.6 (p)

IR (Si, Film)  $\tilde{\nu}_{max}$  = 3437, 2930, 2857, 1613, 1587, 1513, 1463, 1360, 1302, 1249, 1172

HRMS (140 °C 50 eV):  $m/z$  calcd for  $C_{35}H_{58}O_4Si$ : 570.4104; found 570.4394

Optical Rotation:  $[\alpha]_D^{20} = -3.3$  ( $c = 0.48$ , acetone)

$R_f$  (3:1 Hex/EtOAc) = 0.37

**(*R,E*)-4-((1*R*,2*R*,3*aS*,6*aS*)-2-(*tert*-butyldimethylsilyloxy)-5-(5-(4-methoxybenzyloxy)pentyl)-1,2,3,3*a*,6,6*a*-hexahydropentalen-1-yl)-1-*m*-tolylbut-3-en-2-ol**

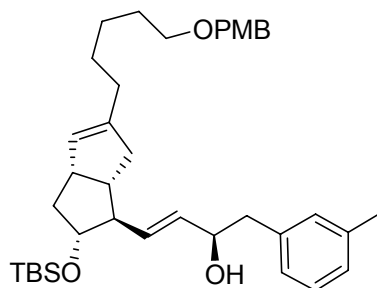

**Method 1: (*S*)-CBS Reduction**

(*E*)-4-((1*R*,2*R*,3*aS*,6*aS*)-2-(*tert*-butyldimethylsilyloxy)-5-(5-(4-methoxybenzyloxy)pentyl)-1,2,3,3*a*,6,6*a*-hexahydropentalen-1-yl)-1-*m*-tolylbut-3-en-2-one, **14** (0.045 g, 0.075 mmol) and (*S*)-2-methyl-CBS-oxazaborolidine\* (1.0 M in toluene, 0.09 mL, 0.090 mmol) in toluene (2 mL) was stirred at -78 °C for 30 minutes. Catecholborane (1.0 M in toluene, 0.18 mL, 0.180 mmol) was added dropwise, via syringe pump, over 12 hours. The reaction was stirred at -78 °C for 14 h at which time methanol (2 mL) was added to quench the remaining hydride.

The reaction was warmed to ambient temperature, extracted with Et<sub>2</sub>O (5 x 2 mL) and combined organic layers were washed with NaOH (1 M, 2 mL), and brine (2 mL), dried over MgSO<sub>4</sub>, filtered and concentrated *in vacuo*. Crude product was purified by flash column chromatography using hexanes:ethyl (3:1) as the mobile phase to afford a 6:1 mixture of (*R,E*)-4-((1*R*,2*R*,3*aS*,6*aS*)-2-(*tert*-butyldimethylsilyloxy)-5-(5-(4-methoxybenzyloxy)pentyl)-1,2,3,3*a*,6,6*a*-hexahydropentalen-1-yl)-1-*m*-tolylbut-3-en-2-ol and (*S,E*)-4-((1*R*,2*R*,3*aS*,6*aS*)-2-(*tert*-butyldimethylsilyloxy)-5-(5-(4-methoxybenzyloxy)pentyl)-1,2,3,3*a*,6,6*a*-hexahydropentalen-1-yl)-1-*m*-tolylbut-3-en-2-ol, respectively, as a clear oil (0.043 g, 95 %).

\* Same procedure was followed, when using the (*S*)-2-*n*-butyl-CBS-oxazaborolidine as catalyst to afford a 7:1 mixture of (*R,E*)-4-((1*R*,2*R*,3*aS*,6*aS*)-2-(*tert*-butyldimethylsilyloxy)-5-(5-(4-methoxybenzyloxy)pentyl)-1,2,3,3*a*,6,6*a*-hexahydropentalen-1-yl)-1-*m*-tolylbut-3-en-2-ol and (*S,E*)-4-((1*R*,2*R*,3*aS*,6*aS*)-2-(*tert*-butyldimethylsilyloxy)-5-(5-(4-methoxybenzyloxy)pentyl)-1,2,3,3*a*,6,6*a*-hexahydropentalen-1-yl)-1-*m*-tolylbut-3-en-2-ol, respectively (86%).

#### Method 2: (*R*)-BINAL-H Reduction

A dry Schlenk flask equipped with a rubber septum was flame-dried and placed under an argon atmosphere. A solution of LiAlH<sub>4</sub> (1M in THF, 0.300 mL, 0.300 mmol, 4 equiv) was added via syringe at room temperature, then a solution of absolute EtOH (0.014 g, 0.300 mmol, 4 equiv) in dry THF (0.3 mL) was added dropwise via cannula over a period of *ca.* 10 min with stirring. Subsequently a THF solution of *bis*(*R*)-naphthol (0.086 g, 0.300 mmol, 4 equiv in 1 mL of dry THF) was added dropwise, and the resulting mixture was stirred for an additional 30 min at rt and used for the asymmetric reduction. The (*R*)-BINAL-H reagent formed in THF was a homogeneous, milky mixture, which did not separate any precipitate; this mixture was cooled to -100°C and a solution of (*E*)-4-((1*R*,2*R*,3*aS*,6*aS*)-2-(*tert*-butyldimethylsilyloxy)-5-(5-(4-methoxybenzyloxy)pentyl)-1,2,3,3*a*,6,6*a*-hexahydropentalen-1-yl)-1-*m*-tolylbut-3-en-2-one, **14**, (0.045 g, 0.075 mmol, 1.0 equiv) in dry THF (2 mL) was added dropwise via cannula. After stirring for 2 h at the same temperature, the asymmetric reduction was completed. Excess BINAL-H was destroyed by addition of methanol (0.2 mL) at -78°C and the mixture, followed by KHSO<sub>4</sub> (5% in water, 0.5 mL) and was warmed to r.t. Et<sub>2</sub>O (2 mL) were added; extracted with Et<sub>2</sub>O (5 x 1 mL) where combined

organic layers were washed with water (1 x 1 mL) and brine (1 x 2 mL), dried over MgSO<sub>4</sub>, filtered and concentrated *in vacuo*. Crude product was purified by flash column chromatography using hexanes:ethyl (3:1) as the mobile phase to afford an 8:1 mixture of *(R,E)*-4-((1*R*,2*R*,3*aS*,6*aS*)-2-(*tert*-butyldimethylsilyloxy)-5-(5-(4-methoxybenzyloxy)pentyl)-1,2,3,3*a*,6,6*a*-hexahydropentalen-1-yl)-1-*m*-tolylbut-3-en-2-ol and *(S,E)*-4-((1*R*,2*R*,3*aS*,6*aS*)-2-(*tert*-butyldimethylsilyloxy)-5-(5-(4-methoxybenzyloxy)pentyl)-1,2,3,3*a*,6,6*a*-hexahydropentalen-1-yl)-1-*m*-tolylbut-3-en-2-ol, respectively, as a clear oil (0.041 g, 90 %).

**C<sub>38</sub>H<sub>56</sub>O<sub>4</sub>Si**                      **M<sub>r</sub> = 604.93**

**<sup>1</sup>H NMR** (400 MHz, CDCl<sub>3</sub>) 7.26 (2H, d, *J* 8.6, Ar*H*), 7.18 (1H, dd, *J* 7.6, 7.4, Ar*H*), 7.08-7.01 (3H, m, Ar*H*), 6.88 (2H, d, *J* 8.6, Ar*H*), 5.65-5.54 (1H, overlapping dd, *J* 15.3, HC=CH), 5.65-5.54 (1H, overlapping dd, *J* 15.3, HC=CH), 5.24 (1H, d, *J* 1.3, vinylic in ring), 4.43 (2H, s, OCH<sub>2</sub>Ar), 4.37-4.30 (1H, m, HC=CHCHOH), 3.80 (3H, s, ArOCH<sub>3</sub>), 3.74 (1H, ddd, *J* 9.6, 9.6, 7.1, CHOTBS), 3.44 (2H, dd, *J* 6.8, 6.8, alkyl CH<sub>2</sub>), 2.98-2.90 (1H, m, CHCH<sub>2</sub>CHOTBS), 2.85 (1H, ddd, *J* 13.3, 13.3, 4.4, CHOHCHHArCH<sub>3</sub>), 2.71 (1H, dd, *J* 13.3, 8.3, CHOHCHHArCH<sub>3</sub>), 2.47-2.36 (1H, m, HC=CCHH), 2.34m(3H, s, ArCH<sub>3</sub>), 2.29 (1H, ddd, *J* 8.8, 8.8, 8.7, HCHCHC=CH), 2.18 (1H, ddd, *J* 12.3, 8.8, 7.0, CHHCHOTBS), 2.06-1.93 (4H, m, HCHC=CH, HC=CCHH, alkyl CH<sub>2</sub>), 1.61 (2H, dddd, *J* 7.3, 7.1, 6.8, 6.6, alkyl CH<sub>2</sub>), 1.47-1.23 (8H, m, 3 x alkyl CH<sub>2</sub>, CHHCHOTBS, OH), 0.86 (9H, s, Si(CH<sub>3</sub>)<sub>3</sub>), 0.02 (6H, s, Si(CH<sub>3</sub>)<sub>2</sub>)

**HRMS** (150 °C 70 eV): *m/z* calcd for C<sub>38</sub>H<sub>56</sub>O<sub>4</sub>Si: 604.3948; found 604.3957

**R<sub>f</sub>** (3:1 Hex/EtOAc) = 0.38

**tert-butyl((S,E)-1-((1R,2R,3aS,6aS)-2-(tert-butyldimethylsilyloxy)-5-(5-(4-methoxybenzyloxy)pentyl)-1,2,3,3a,6,6a-hexahydropentalen-1-yl)oct-1-en-3-yloxy)dimethylsilane, 15**

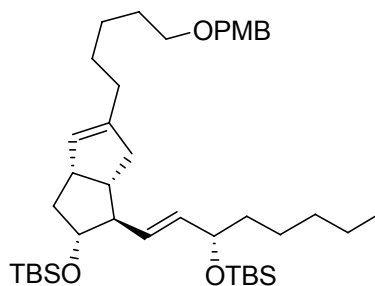

**15**

**C<sub>41</sub>H<sub>72</sub>O<sub>4</sub>Si<sub>2</sub>**      **M<sub>r</sub> = 685.18**

To a solution of (S,E)-1-((1R,2R,3aS,6aS)-2-(tert-butyldimethylsilyloxy)-5-(5-(4-methoxybenzyloxy)pentyl)-1,2,3,3a,6,6a-hexahydropentalen-1-yl)oct-1-en-3-ol (0.200 g, 0.350 mmol) and imizadole (0.060 g, 0.875 mmol) in anhydrous DMF (2 mL), TBSCl (0.63 g, 0.420 mmol) in anhydrous DMF (1 mL) was dropwise added and stirred for 14 h. H<sub>2</sub>O (3 mL) and Et<sub>2</sub>O (5 mL) were added, extracted with Et<sub>2</sub>O (5 x 3 mL). Combined organic layers were washed with H<sub>2</sub>O (1 x 2 mL), brine (1 x 2 mL), dried over MgSO<sub>4</sub>, filtered and concentrated *in vacuo*. Crude product was purified by flash column chromatography using hexanes:ethyl acetate (5:1) as the mobile phase to afford tert-butyl((S,E)-1-((1R,2R,3aS,6aS)-2-(tert-butyldimethylsilyloxy)-5-(5-(4-methoxybenzyloxy)pentyl)-1,2,3,3a,6,6a-hexahydropentalen-1-yl)oct-1-en-3-yloxy)dimethylsilane, **15**, as a pale yellow oil (0.239 g, 100 %).

**<sup>1</sup>H NMR** (600 MHz, CDCl<sub>3</sub>) 7.26 (2H, d, *J* 8.5, ArH), 6.88 (2H, d, *J* 8.5, ArH), 5.52-5.44 (1H, overlapping dd, *J* 15.4, HC=CH), 5.52-5.44 (1H, overlapping dd, *J* 15.4, HC=CH), 5.23 (1H, d, *J* 1.5, vinylic in ring), 4.43 (2H, s, OCH<sub>2</sub>Ar), 4.06 (1H, ddd, *J* 6.2, 6.2, 4.7, HC=CHCHOTBS), 3.80 (3H, s, ArOCH<sub>3</sub>), 3.74 (1H, ddd, *J* 9.4, 7.0, 7.0, CHOTBS), 3.44 (2H, dd, *J* 6.8, 6.6, alkyl CH<sub>2</sub>), 2.97-2.88 (1H, m, CHCH<sub>2</sub>CHOTBS), 2.39 (1H, dd, *J* 16.3, 8.6, HC=CCHH), 2.23 (1H, dddd, *J* 9.4, 9.4, 8.8, 1.7, HCHCHC=CH), 2.18 (1H, ddd, *J* 12.2, 8.8, 6.9, CHHCHOTBS), 2.04-1.93 (4H, m, HCHC=CH, HC=CCHH, alkyl CH<sub>2</sub>), 1.61 (2H, dddd, *J* 7.5, 7.3, 6.8, 6.8, alkyl CH<sub>2</sub>), 1.53-1.38 (4H, m, 2 x alkyl CH<sub>2</sub>), 1.38-1.22 (9H, 4 x CH<sub>2</sub>, CHHCHOTBS), 0.90-0.88 (3H, m, alkyl CH<sub>3</sub>), 0.89 (9H, s, SiC(CH<sub>3</sub>)<sub>3</sub>), 0.86 (9H, s, SiC(CH<sub>3</sub>)<sub>3</sub>), 0.04 (3H, s, SiCH<sub>3</sub>), 0.02 (9H, s, SiCH<sub>3</sub>, Si(CH<sub>3</sub>)<sub>2</sub>)



methoxybenzyloxy)pentyl)-1,2,3,3*a*,4,6*a*-hexahydropentalen-2-yloxy)dimethylsilane, **16**, as a pale yellow oil (0.077 g, 96 %).

**<sup>1</sup>H NMR** (400 MHz, CDCl<sub>3</sub>) 7.26 (2H, d, *J* 8.6; ArH), 7.14 (1H, dd, *J* 7.6, 7.3, ArH), 7.02-6.95 (3H, m, ArH), 6.88 (2H, d, *J* 8.6, ArH), 5.56-5.42 (1H, overlapping dd, *J* 15.3, 6.3, HC=CH), 5.56-5.42 (1H, overlapping dd, *J* 15.3, 6.9, HC=CH), 5.23 (1H, d, *J* 1.3, vinylic in ring), 4.43 (2H, s, OCH<sub>2</sub>Ar), 4.22 (1H, ddd, *J* 7.6, 5.9, 5.4, HC=CHCHOTBS), 3.80 (3H, s, ArOCH<sub>3</sub>), 3.72 (1H, ddd, *J* 9.6, 9.5, 6.8, CHOTBS), 3.44 (2H, *J* 6.8, 6.6, alkyl CH<sub>2</sub>), 3.01-2.88 (1H, m, CHCH<sub>2</sub>CHOTBS), 2.77-2.64 (1H, overlapping dd, *J* 13.1, 4.5, HHCArCH<sub>3</sub>), 2.77-2.64 (1H, overlapping dd, *J* 13.0, 7.7, HHCArCH<sub>3</sub>), 2.39 (1H, dd, *J* 15.7, 8.8, HC=CCHH), 2.31 (3H, s, ArCH<sub>3</sub>), 2.25 (1H, dddd, *J* 9.1, 8.8, 8.5, 2.0, HCHCHC=CH), 2.20-2.14 (1H, m, CHHCHOTBS), 2.05-1.91 (4H, m, HCHC=CH, HC=CCHH, alkyl CH<sub>2</sub>), 1.61 (2H, dddd, *J* 7.3, 7.3, 6.8, 6.6, alkyl CH<sub>2</sub>), 1.48-1.29 (6H, m, 3 x alkyl CH<sub>2</sub>), 1.29-1.22 (1H, m, CHHCHOTBS), 0.86 (9H, s, SiC(CH<sub>3</sub>)<sub>3</sub>), 0.80 (9H, s, SiC(CH<sub>3</sub>)<sub>3</sub>), 0.02 (6H, s, Si(CH<sub>3</sub>)<sub>2</sub>), -0.14 (3H, s, SiCH<sub>3</sub>), -0.22 (3H, s, SiCH<sub>3</sub>)

**<sup>13</sup>C-NMR** (100 MHz, CDCl<sub>3</sub>) 159.1 (q), 141.9 (q), 139.0 (q), 137.3 (q), 134.4 (t), 131.9 (t), 130.9 (t), 130.8 (q), 129.2 (t), 127.8 (t), 127.8 (t), 126.9 (t), 126.6 (t), 113.8 (t), 77.8 (t), 75.3 (t), 72.5 (s), 70.2 (s), 57.3 (t), 55.3 (p), 45.4 (t), 45.3 (s), 43.2 (t), 40.8 (s), 40.1 (s), 31.0 (s), 29.6 (s), 27.6 (s), 26.1 (s), 25.9 (p), 25.8 (p), 21.3 (p), 18.2 (q), 18.1 (q), -4.4 (p), -4.6 (p), -4.6 (p), -5.1 (p)

**IR** (Si, Film)  $\tilde{\nu}_{\max}$  = 2929, 2856, 1714, 1610, 1513, 1462, 1360, 1249, 1112, 835

**HRMS** (160 °C 70 eV): *m/z* calcd for C<sub>44</sub>H<sub>70</sub>O<sub>4</sub>Si<sub>2</sub>: 718.4813; found 718.4801

**Optical Rotation:**  $[\alpha]_{\text{D}}^{20} = +1.4$  (c = 0.66, acetone)

**R<sub>f</sub>** (10:1 Hex/EtOAc) = 0.39

**5-((3*aS*,5*R*,6*R*,6*aS*)-5-hydroxy-6-((*S,E*)-3-hydroxyoct-1-enyl)-1,3*a*,4,5,6,6*a*-hexahydropentalen-2-yl)pentanoic acid (Isocarbacyclin), 2**

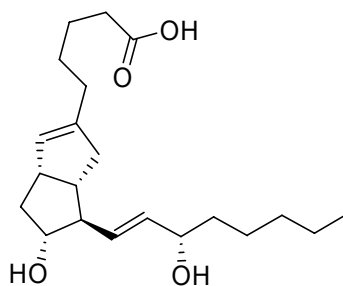

**Isocarbacyclin (2)**

**C<sub>21</sub>H<sub>34</sub>O<sub>4</sub>**

**M<sub>r</sub> = 350.25**

**<sup>1</sup>H NMR** (600 MHz, CDCl<sub>3</sub>) 5.56 (1H, dd, *J* 15.3, 7.2, vinylic in chain), 5.50 (1H, dd, *J* 15.3, 8.4, vinylic in chain), 5.29 (1H, d, *J* 1.4, vinylic in ring), 5.23-3.26 (1H, broad s, COOH), 4.06 (1H, ddd, *J* 6.9, 6.7, 6.7, HC=CHC(OH)H), 3.76 (1H, ddd, *J* 9.6, 7.2, 7.1, HCOH), 3.00 (1H, ddd, *J* 8.8, 8.6, 2.1, CHCH<sub>2</sub>CHOH), 2.42-2.25 (5H, m, alkyl CH<sub>2</sub>, CHCHCHOH, CHHCHCH, CHHCHOH), 2.06 (2H, dd, *J* 7.2, 6.9, alkyl CH<sub>2</sub>), 1.99 (1H, bd, *J* 15.7, CHHCHCH), 1.92 (1H, ddd, *J* 9.5, 9.2, 8.8, CHCHOH), 1.70-1.54 (3H, m, alkyl CH<sub>2</sub>, HC=CHC(OH)HCHH), 1.52-1.44 (3H, m, alkyl CH<sub>2</sub>, HC=CHC(OH)HCHH), 1.40-1.23 (7H, m, 3 x alkyl CH<sub>2</sub>, CHHCHOH), 0.89 (3H, t, *J* 7.0, CH<sub>3</sub>)

**<sup>13</sup>C-NMR** (100 MHz, CDCl<sub>3</sub>) 178.1 (q), 141.1 (q), 135.6 (t), 133.0 (t), 128.9 (t), 77.3 (t), 73.3 (t), 58.0 (t), 45.6 (t), 44.3 (t), 39.5 (s), 39.2 (s), 37.0 (s), 33.7 (s), 31.7 (s), 30.3 (s), 26.9 (s), 25.2 (s), 24.3 (s), 22.6 (s), 14.0 (p)

**IR** (Si, Film)  $\tilde{\nu}_{\max}$  = 3369, 2927, 2857, 1707, 1653, 1560, 1540, 1507, 1457, 1261, 1088, 970

**HRMS** (170 °C 70 eV): *m/z* calcd for C<sub>21</sub>H<sub>34</sub>O<sub>4</sub>: 350.2457; found 350.2432

**Optical Rotation:**  $[\alpha]_{\text{D}}^{20} = +11.8$  (c = 0.46, CH<sub>2</sub>Cl<sub>2</sub>)

**R<sub>f</sub>** (EtOAc/1% AcOH) = 0.33

<sup>1</sup>H, <sup>13</sup>C NMR and optical rotation were concurrent with literature values for Isocarbacyclin. See T. Ishikawa; H. Ishii; K. Shimizu; H. Nakao; J. Urano; T. Kudo; S. Saito, *J. Org. Chem.* **2004**, *69*, 8133.



**5-((3*aS*,5*R*,6*R*,6*aS*)-5-hydroxy-6-((*R,E*)-3-hydroxy-4-*m*-tolylbut-1-enyl)-1,3*a*,4,5,6,6*a*-hexahydropentalen-2-yl)pentanoic acid (15*R*-TIC), 3**

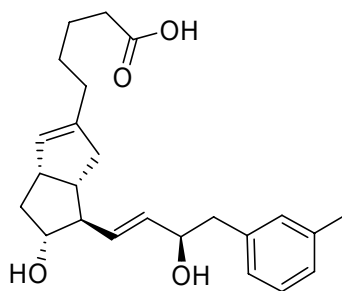

**15*R*-TIC (3)**

**C<sub>24</sub>H<sub>32</sub>O<sub>4</sub>**

**M<sub>r</sub> = 384.23**

**<sup>1</sup>H NMR** (600 MHz, CDCl<sub>3</sub>) 7.20 (1H, dd, *J* 7.6, 7.5, Ar*H*), 7.05 (1H, d, *J* 7.6, Ar*H*), 7.02 (1H, s, Ar*H*), 7.00 (1H, d, *J* 7.5, Ar*H*), 5.61 (1H, ddd, *J* 15.4, 6.7, 0.7, vinylic in chain), 5.44 (1H, ddd, *J* 15.4, 8.7, 0.7, vinylic in chain), 5.28 (1H, d, *J* 3.3, vinylic in ring), 4.35 (1H, ddd, *J* 6.6, 6.5, 6.4, HC=CHC(OH)H), 3.63 (1H, ddd, *J* 9.5, 7.0, 6.9, HCOH), 2.98 (1H, ddd, *J* 9.0, 8.9, 8.9, CHCH<sub>2</sub>CHOH), 2.86 (1H, dd, *J* 13.3, 7.2, CHHAr), 2.79 (1H, dd, *J* 13.3, 6.3, CHHAr), 2.42-2.34 (2H, m, CH<sub>2</sub>COOH), 2.33 (3H, s, CH<sub>3</sub>), 2.31-2.27 (2H, m, CHCHCHOH, CHHCHCH), 2.26 (1H, ddd, *J* 12.5, 8.8, 7.1, CHHCHOH), 2.08-1.94 (3H, m, alkyl CH<sub>2</sub>, CHHCHCH), 1.89 (1H, ddd, *J* 9.4, 9.3, 9.2, CHCHOH), 1.70-1.58 (2H, m, alkyl CH<sub>2</sub>), 1.54-1.45 (2H, m, alkyl CH<sub>2</sub>), 1.39-1.18 (3H, CHHCHOH, HC=CHCOH)

**<sup>13</sup>C-NMR** (100 MHz, CDCl<sub>3</sub>) 178.3 (q), 141.3 (q), 138.2 (q), 137.8 (q), 134.3 (t), 132.9 (t), 130.4 (t), 128.5 (t), 128.3 (t), 127.4 (t), 126.6 (t), 76.9 (s), 73.7 (t), 58.1 (t), 45.6 (t), 44.3 (t), 44.3 (t), 39.5 (s), 39.3 (s), 33.5 (s), 30.5 (s), 27.0 (s), 24.4 (s), 21.4 (p)

**IR** (Si, Film)  $\tilde{\nu}_{\max}$  = 3401, 2917, 2849, 1701, 1653, 1560, 1540, 1507, 1457, 1261, 1092, 1020

**HRMS** (170 °C 70 eV): *m/z* calcd for C<sub>24</sub>H<sub>32</sub>O<sub>4</sub>: 384.2301; found 384.2287

**R<sub>f</sub>** (EtOAc/1% AcOH) = 0.52

<sup>1</sup>H, <sup>13</sup>C NMR and optical rotation were concurrent with literature values for 15*R*-TIC. See M. Suzuki; K. Kato; R. Noyori; Y. Watanabe; H. Takechi.; K. Matsumura; B. Långström; Y. Watanabe, *Angew. Chem. Int. Ed. Engl.* **1996**, 35, 334.

\* Care must be taken on deprotection of the C15 TBS ether (in 0.5N HCl media) due to the acid labile nature of this position, which can ultimately lead to the elimination of H<sub>2</sub>O, to give the corresponding conjugated system.

<sup>1</sup>H and <sup>13</sup>C NMR: *(E)*-3-((1*R*,2*R*,3*aS*,6*aS*)-2-(*tert*-butyldimethylsilyloxy)-5-(5-(4-methoxybenzyloxy)pentyl)-1,2,3,3*a*,6,6*a*-hexahydropentalen-1-yl)-*N*-methoxy-*N*-methylacrylamide (7)

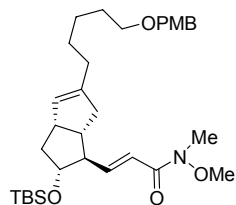

*(E)*-3-((1*R*,2*R*,3*aS*,6*aS*)-2-(*tert*-butyldimethylsilyloxy)-5-(5-(4-methoxybenzyloxy)pentyl)-1,2,3,3*a*,6,6*a*-hexahydropentalen-1-yl)-*N*-methoxy-*N*-methylacrylamide (7)

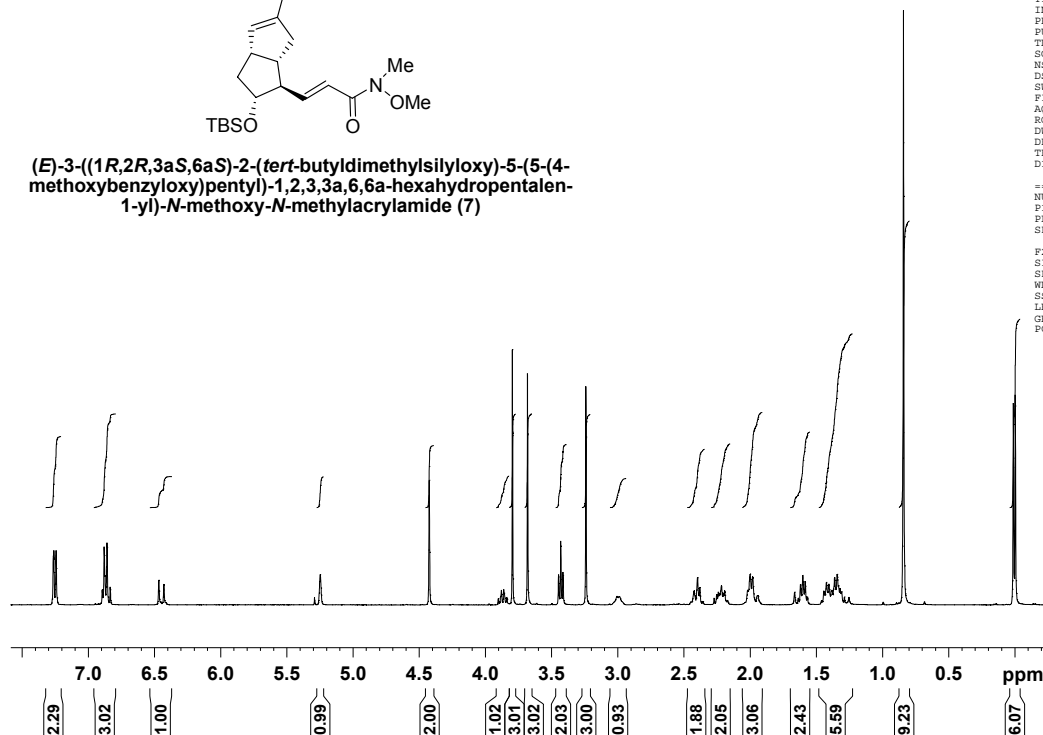

```

Current Data Parameters
NAME      NAS423
EXPNO    1
PROCNO   1

F2 - Acquisition Parameters
Date_    20050124
Time     18.48
INSTRUM  avance400
PROBHD   5 mm BBO BB-1H
PULPROG  zg30
TD        65536
SOLVENT  CDCl3
NS        16
DS        2
SWH       8278.146 Hz
FIDRES    0.126134 Hz
AQ        3.9584243 sec
RG         101.6
DW        60.400 usec
DE         6.00 usec
TE        300.0 K
D1        1.0000000 sec

===== CHANNEL f1 =====
NUC1      1H
P1        8.75 usec
PL1       -3.00 dB
SFO1      400.1324710 MHz

F2 - Processing parameters
SI         32768
SF         400.1300097 MHz
WDW        EM
SSB         0
LB         0.10 Hz
GB         0
PC         1.00
    
```

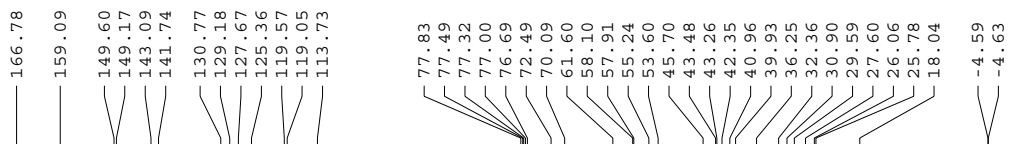

```

Current Data Parameters
NAME      NAS423
EXPNO    2
PROCNO   1

F2 - Acquisition Parameters
Date_    20050124
Time     19.34
INSTRUM  avance400
PROBHD   5 mm BBO BB-1H
PULPROG  jmod
TD        65536
SOLVENT  CDCl3
NS        800
DS        2
SWH       25062.656 Hz
FIDRES    0.382426 Hz
AQ        1.3074932 sec
RG         6502
DW        19.950 usec
DE         6.00 usec
TE        300.0 K
CNSTZ    145.0000000
CNST1    1.0000000
D1        2.0000000 sec
d11      0.0000000 sec
d20      0.0089665 sec
DELTA    0.0001311 sec

===== CHANNEL f1 =====
NUC1      13C
P1        10.10 usec
P2        20.60 usec
PL1       -1.00 dB
PL2       -1.00 dB
SFO1      100.6232933 MHz

===== CHANNEL f2 =====
CPDPRG2  waltz16
NUC2      1H
PCPD2    100.00 usec
PL2      -3.00 dB
PL12     16.00 dB
SFO2     400.1316005 MHz

F2 - Processing parameters
SI         32768
SF         100.6127717 MHz
WDW        EM
SSB         0
LB         1.00 Hz
GB         0
PC         1.40
    
```

*(E)*-3-((1*R*,2*R*,3*aS*,6*aS*)-2-(*tert*-butyldimethylsilyloxy)-5-(5-(4-methoxybenzyloxy)pentyl)-1,2,3,3*a*,6,6*a*-hexahydropentalen-1-yl)-*N*-methoxy-*N*-methylacrylamide (7)

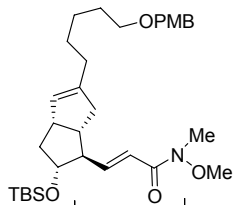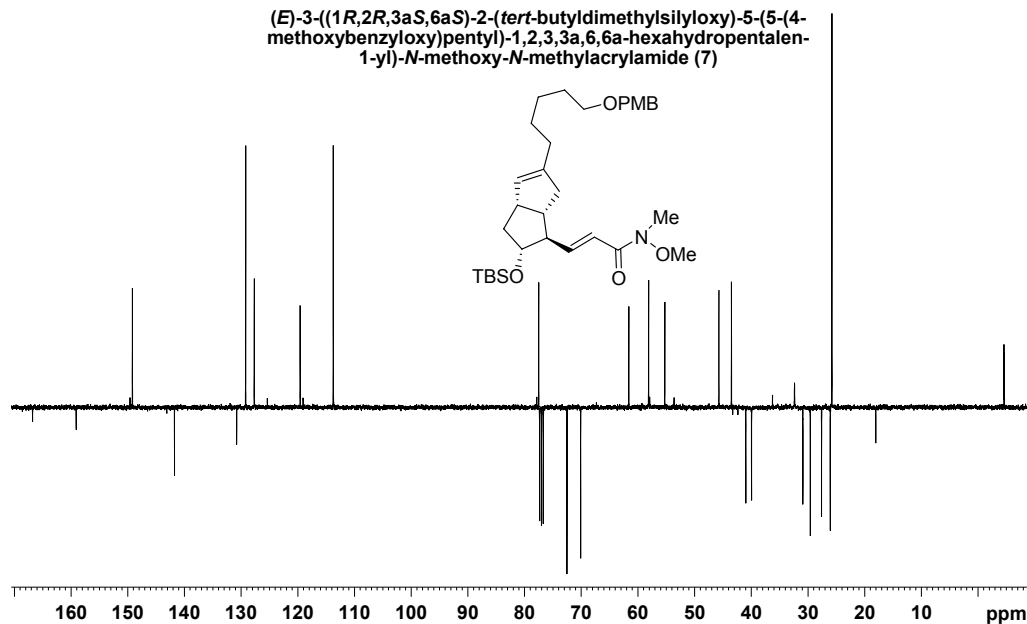

<sup>1</sup>H and <sup>13</sup>C NMR: (*E*)-3-((1*R*,2*R*,3*aS*,6*aS*)-2-(*tert*-butyldimethylsilyloxy)-5-(5-(4-methoxybenzyloxy)pentyl)-1,2,3,3*a*,6,6*a*-hexahydropentalen-1-yl)acrylaldehyde (8)

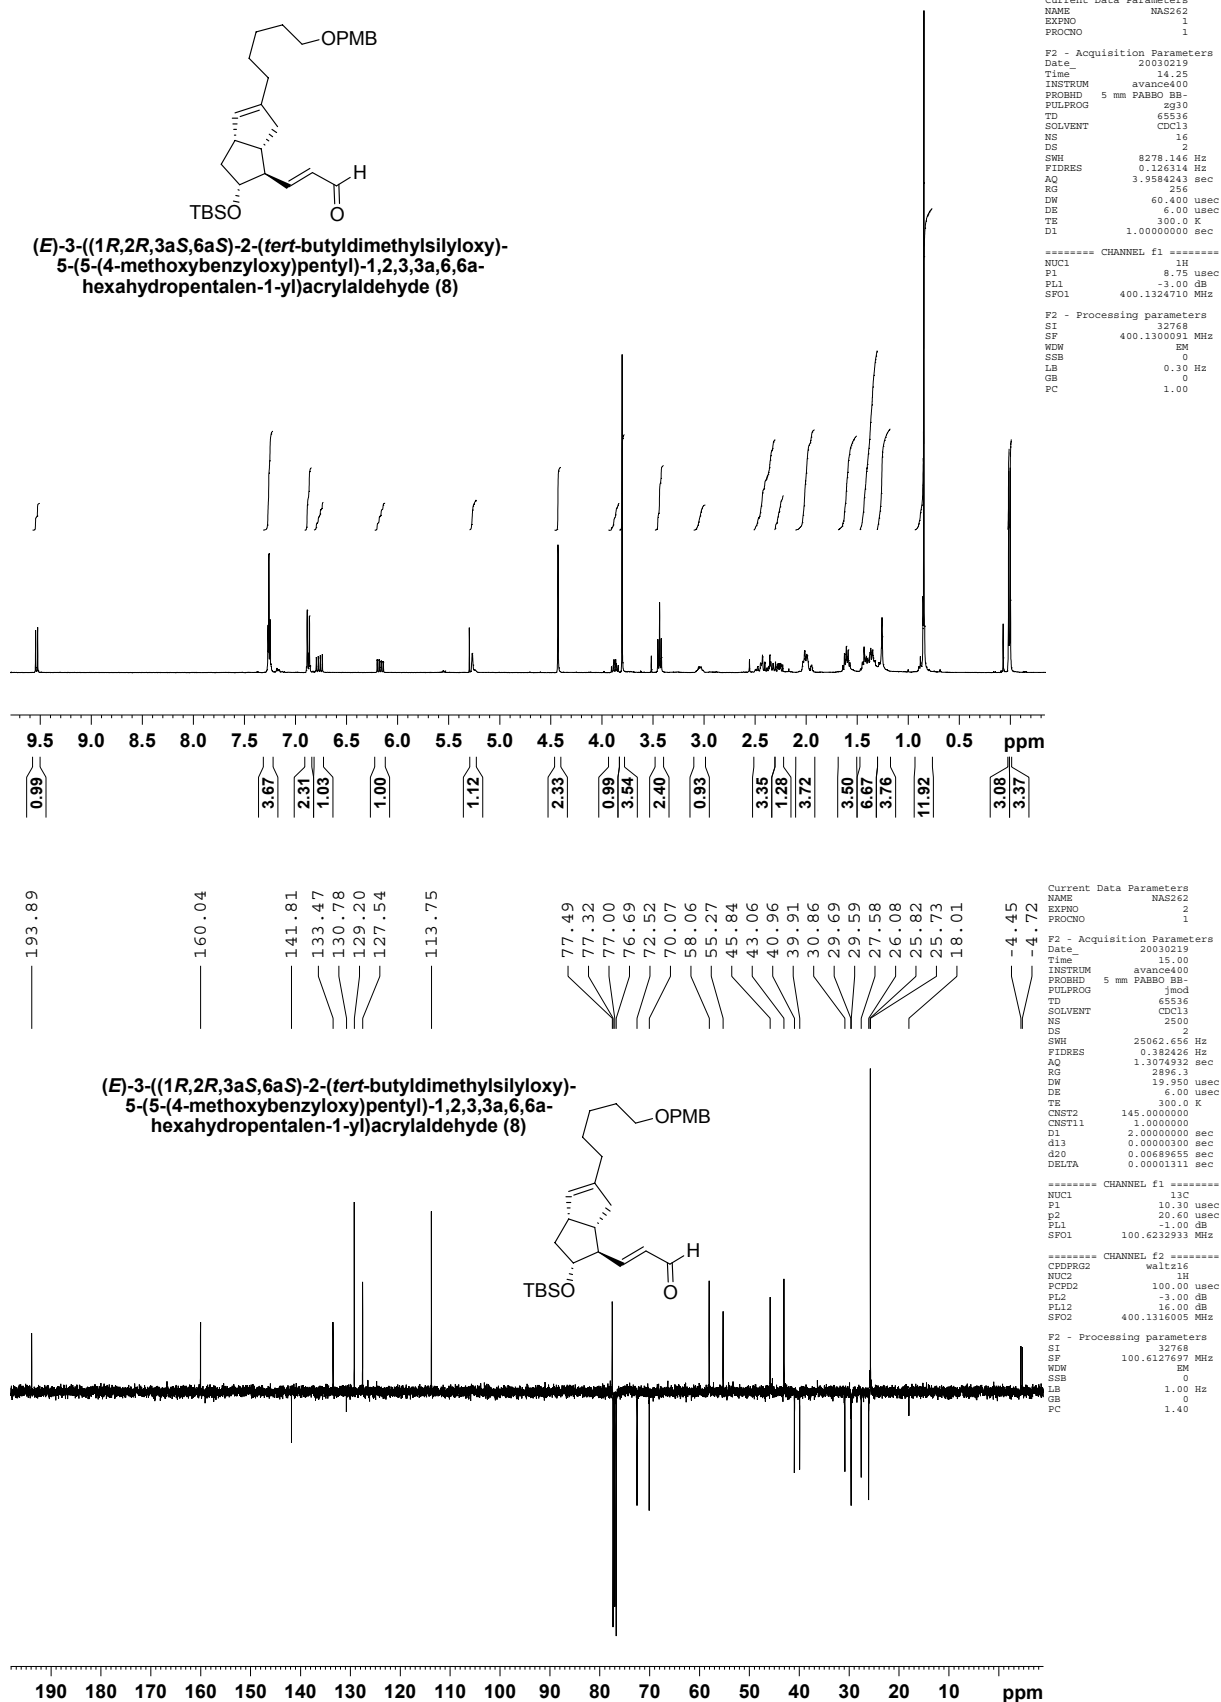

$^1\text{H}$  and  $^{13}\text{C}$  NMR: *(E)*-1-((1*R*,2*R*,3*aS*,6*aS*)-2-(*tert*-butyldimethylsilyloxy)-5-(5-(4-methoxybenzyloxy)pentyl)-1,2,3,3*a*,6,6*a*-hexahydropentalen-1-yl)oct-1-en-3-one (13)

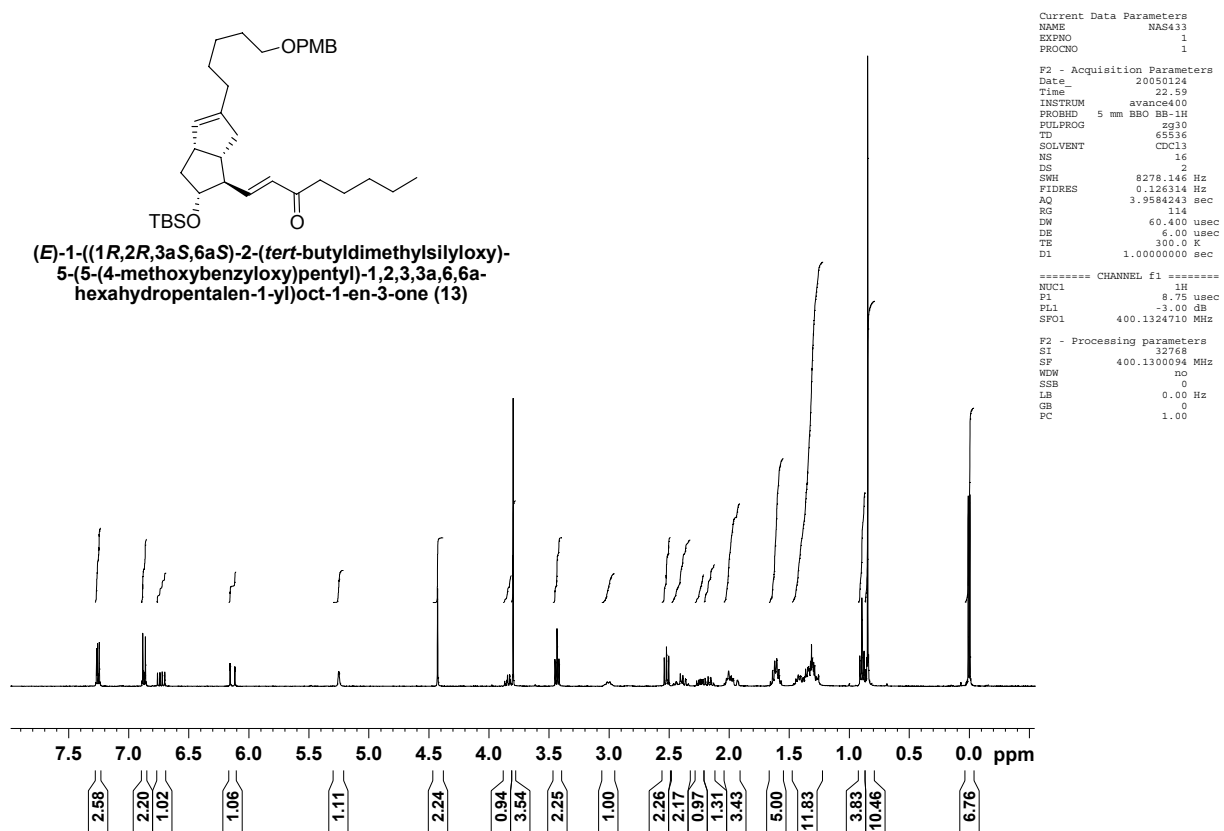

```

Current Data Parameters
NAME      MAS433
EXPNO    1
PROCNO   1

F2 - Acquisition Parameters
Date_    20050124
Time     22.59
INSTRUM  avance400
PROBHD   5 mm BBO BB-1H
PULPROG  zg30
TD        65536
SOLVENT  CDCl3
NS        16
DS        2
SWH       8278.146 Hz
FIDRES    0.126314 Hz
AQ        3.9584243 sec
RG        114
DW        60.400 usec
DE        6.00 usec
TE        300.0 K
D1        1.0000000 sec

===== CHANNEL f1 =====
NUC1      1H
P1        8.75 usec
PL1       -3.00 dB
SFO1      400.1324710 MHz

F2 - Processing parameters
SI        32768
SF        400.1300094 MHz
WDW       HC
SSB       0
LB        0.00 Hz
GB        0
PC        1.00
    
```

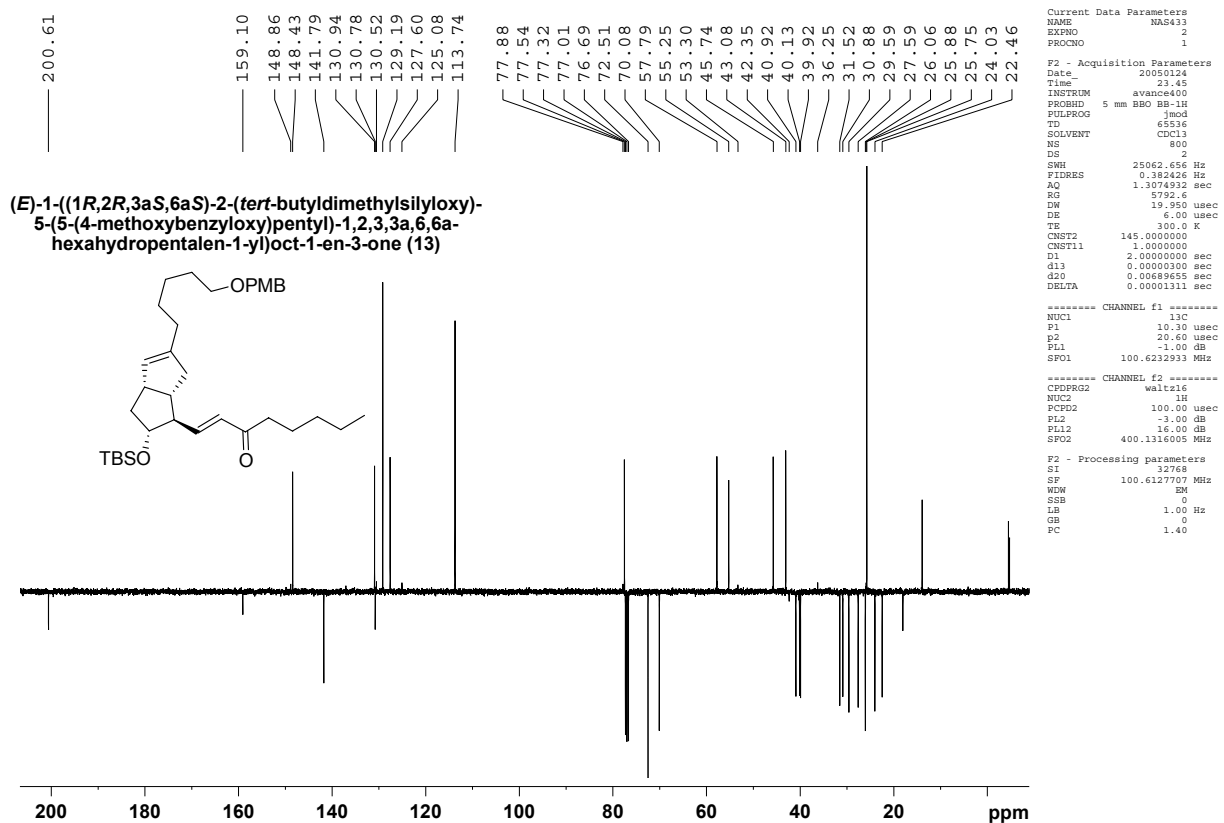

```

Current Data Parameters
NAME      MAS433
EXPNO    2
PROCNO   1

F2 - Acquisition Parameters
Date_    20050124
Time     23.45
INSTRUM  avance400
PROBHD   5 mm BBO BB-1H
PULPROG  jmod
TD        65536
SOLVENT  CDCl3
NS        800
DS        2
SWH       25062.656 Hz
FIDRES    0.382426 Hz
AQ        1.3074923 sec
RG        5792.6
DW        19.950 usec
DE        6.00 usec
TE        300.0 K
D1        145.0000000 sec
D11       1.0000000 sec
D13       2.0000000 sec
d20       0.0000000 sec
d20       0.00689655 sec
DELTA     0.00001311 sec

===== CHANNEL f1 =====
NUC1      13C
P1        10.30 usec
P2        20.60 usec
PL1       -1.00 dB
PL2       -3.00 dB
SFO1      100.6233933 MHz

===== CHANNEL f2 =====
CPDPRG2  waltz16
NUC2      1H
PCPD2    100.00 usec
PL2       -3.00 dB
PL12     16.00 dB
SFO2     400.1316005 MHz

F2 - Processing parameters
SI        32768
SF        100.6127707 MHz
WDW       EM
SSB       0
LB        1.00 Hz
GB        0
PC        1.40
    
```

<sup>1</sup>H and <sup>13</sup>C NMR: *(E)*-4-((1*R*,2*R*,3*aS*,6*aS*)-2-(*tert*-butyldimethylsilyloxy)-5-(5-(4-methoxybenzyloxy)pentyl)-1,2,3,3*a*,6,6*a*-hexahydropentalen-1-yl)-1-*m*-tolylbut-3-en-2-one (14)

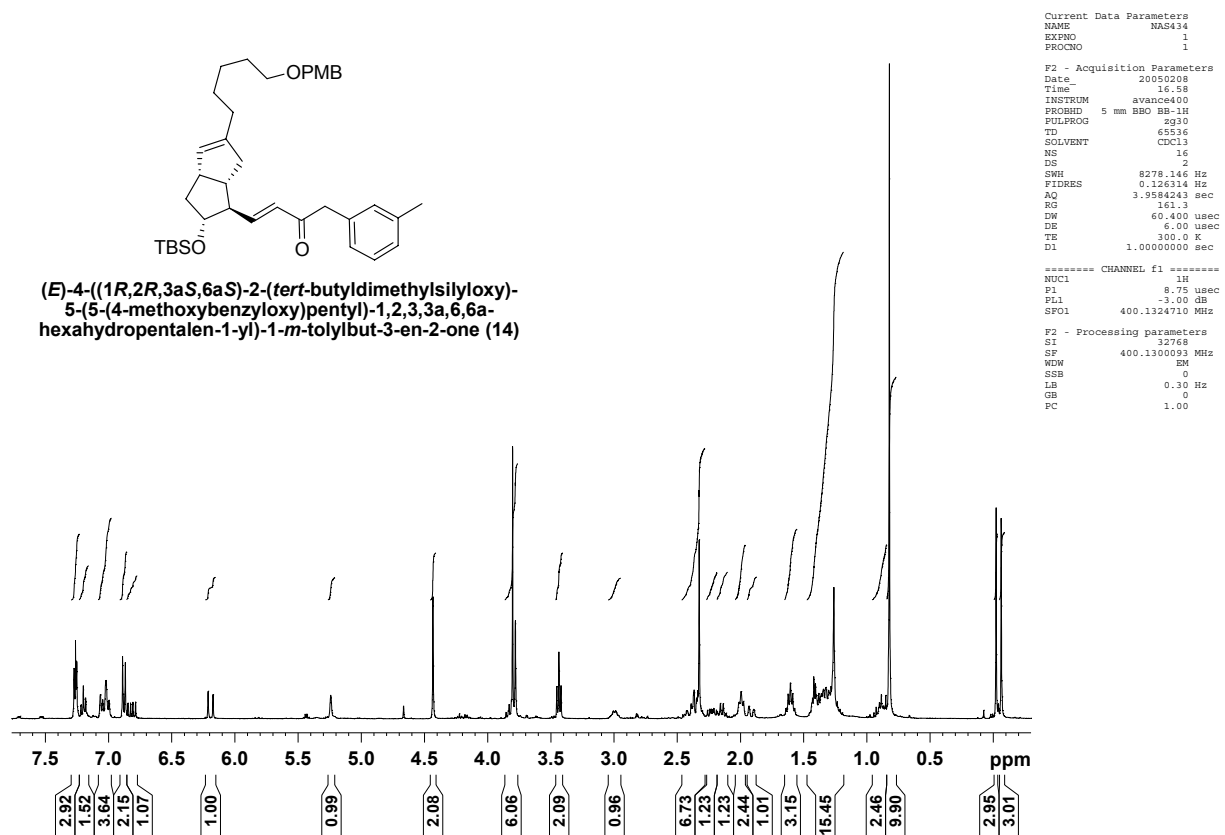

```

Current Data Parameters
NAME      NAR434
EXPNO     1
PROCNO    1

F2 - Acquisition Parameters
Date_     20050208
Time      16.58
INSTRUM   avance400
PROBHD    5 mm BBO BB-1H
PULPROG   zgpg30
TD         65536
SOLVENT   CDCl3
NS         16
DS         2
SWH        8278.146 Hz
FIDRES     0.126314 Hz
AQ         3.9584243 sec
RG         161.3
DW         60.400 usec
DE         6.00 usec
TE         300.2 K
D1         1.00000000 sec

===== CHANNEL f1 =====
NUC1       1H
P1         8.75 usec
PL1        -1.00 dB
SFO1       400.1324710 MHz

F2 - Processing parameters
SI         32768
SF         400.1300093 MHz
WDW        EM
SSB        0
LB         0.30 Hz
GB         0
PC         1.00
    
```

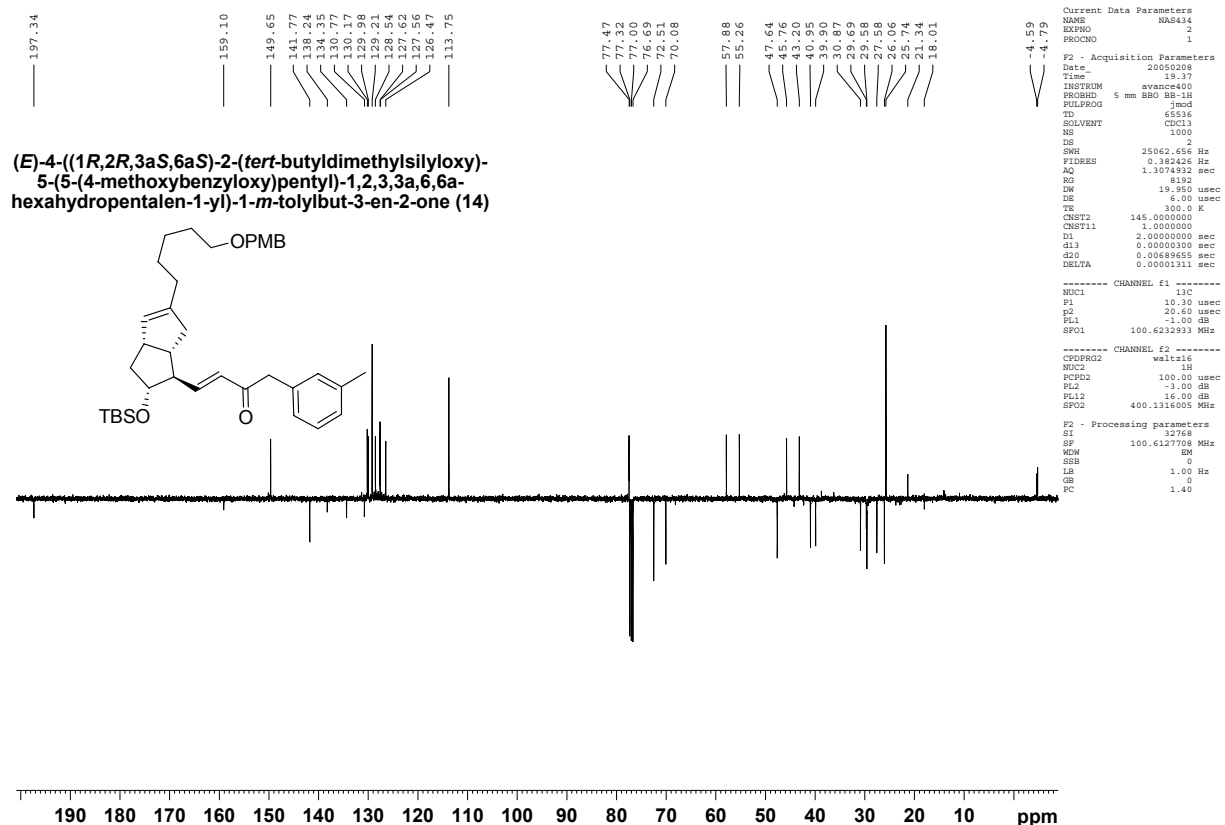

```

Current Data Parameters
NAME      NAR434
EXPNO     2
PROCNO    1

F2 - Acquisition Parameters
Date_     20050208
Time      19.17
INSTRUM   avance400
PROBHD    5 mm BBO BB-1H
PULPROG   jmod
TD         65536
SOLVENT   CDCl3
NS         1000
DS         2
SWH        25062.656 Hz
FIDRES     0.382426 Hz
AQ         1.3074932 sec
RG         8192
DW         19.950 usec
DE         6.00 usec
TE         300.2 K
D1         145.0000000
D11        2.0000000 sec
d13        0.0000030 sec
SFO1       100.6232933 MHz
DELTA      0.00001311 sec

===== CHANNEL f1 =====
NUC1       13C
P1         10.10 usec
PL1        -1.00 dB
SFO1       100.6232933 MHz

===== CHANNEL f2 =====
CPDPRG2   waltz16
NUC2       1H
PCPD2     100.00 usec
PL2        -1.00 dB
PL12       16.00 dB
SFO2       400.1316005 MHz

F2 - Processing parameters
SI         32768
SF         100.6127708 MHz
WDW        EM
SSB        0
LB         1.00 Hz
GB         0
PC         1.40
    
```

$^1\text{H}$  and  $^{13}\text{C}$  NMR: (S,E)-1-((1R,2R,3aS,6aS)-2-(tert-butylidimethylsilyloxy)-5-(5-(4-methoxybenzyloxy)pentyl)-1,2,3,3a,6,6a-hexahydropentalen-1-yl)oct-1-en-3-ol

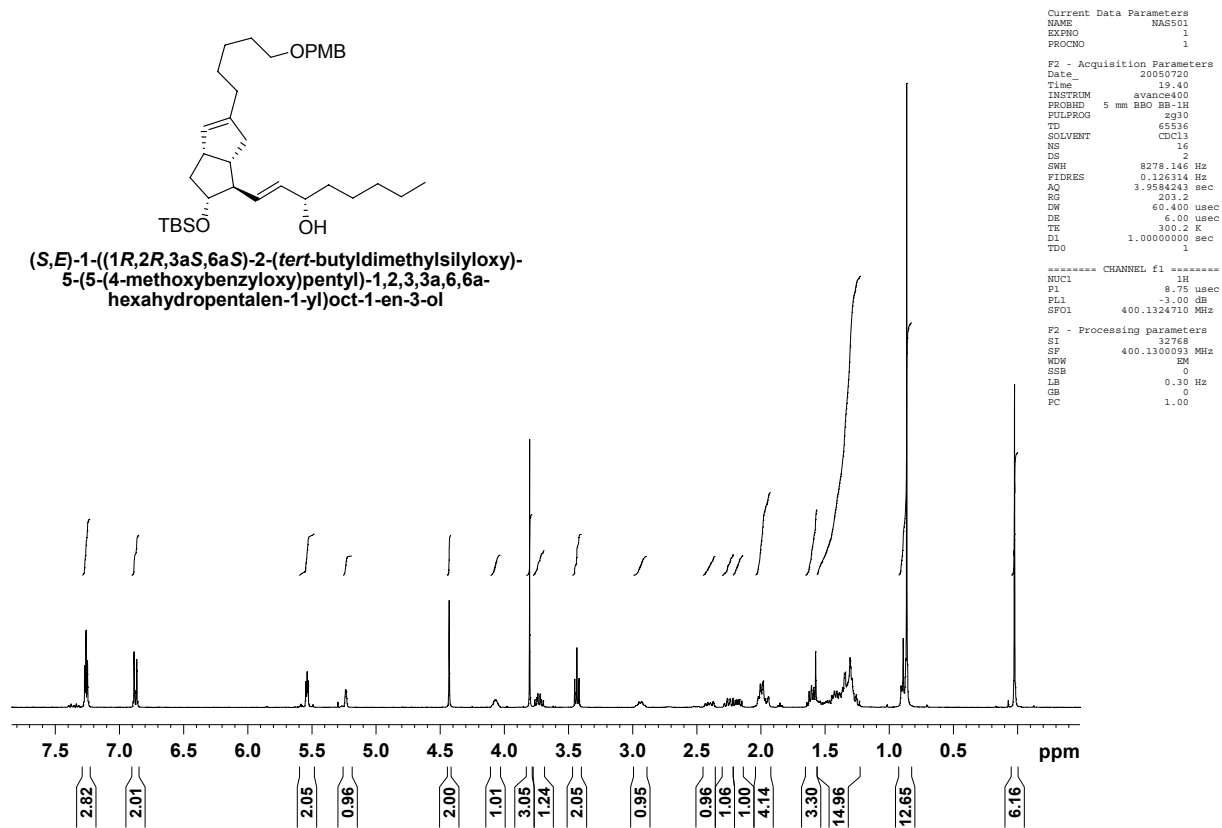

```

Current Data Parameters
NAME      NMR501
EXPNO    1
PROCNO   1

F2 - Acquisition Parameters
Date_    20050720
Time     19.40
INSTRUM  avance400
PROBHD   5 mm BBO BB-1H
PULPROG  zg30
TD        65536
SOLVENT  CDCl3
NS        16
DS        2
SWH       8278.146 Hz
FIDRES   0.126314 Hz
AQ        3.9584243 sec
RG        205.2
DM        60.400 usec
DE        6.00 usec
TE        300.2 K
D1        1.00000000 sec
TD0       1

===== CHANNEL f1 =====
NUC1     1H
P1       8.75 usec
PL1      -3.00 dB
SFO1     400.1324710 MHz

F2 - Processing parameters
SI       32768
SF       400.1300093 MHz
WDW      EM
SSB      0
GB       0.30 Hz
PC       1.00
    
```

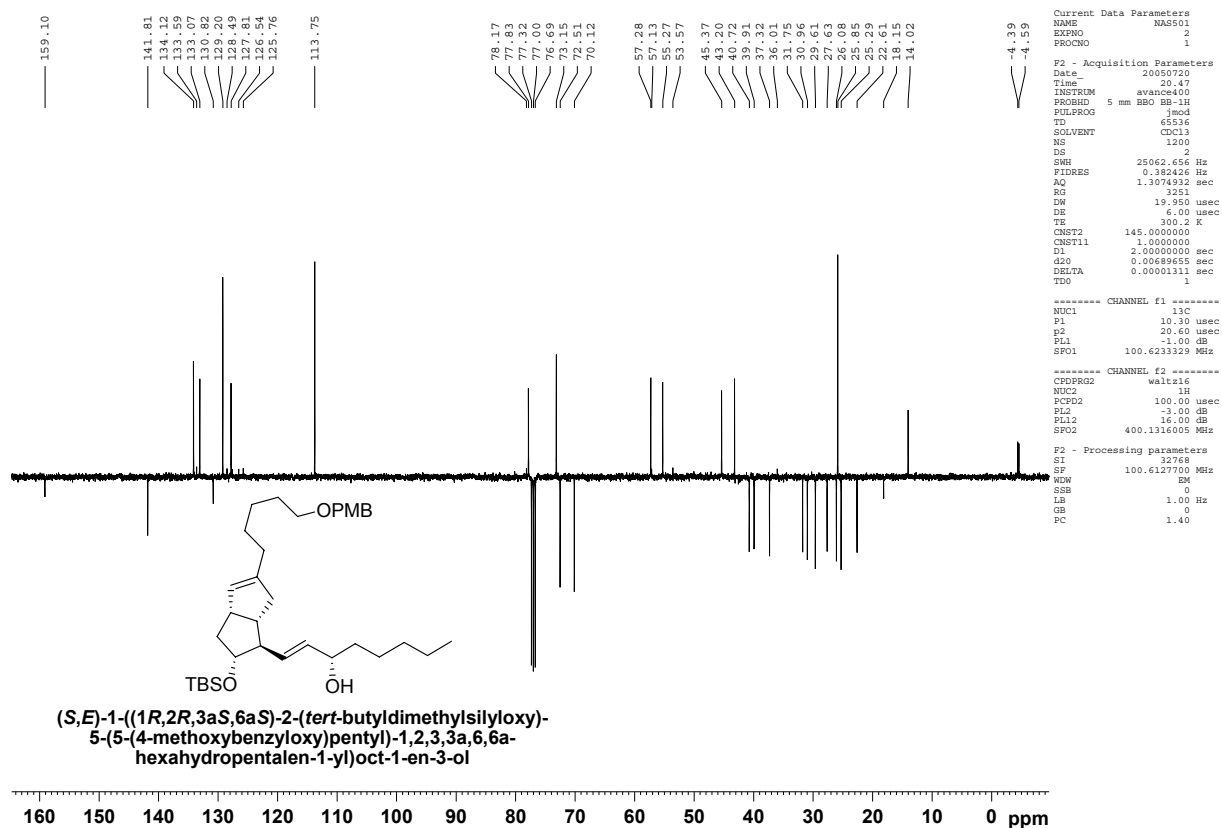

```

Current Data Parameters
NAME      NMR501
EXPNO    2
PROCNO   1

F2 - Acquisition Parameters
Date_    20050720
Time     20.47
INSTRUM  avance400
PROBHD   5 mm BBO BB-1H
PULPROG  jmod
TD        65536
SOLVENT  CDCl3
NS        1200
DS        3
SWH       25062.655 Hz
FIDRES   0.182426 Hz
AQ        1.3074932 sec
RG        325.1
DM        19.950 usec
DE        6.00 usec
TE        300.2 K
D1        2.00000000 sec
D2        0.00689655 sec
DELTA    0.00001311 sec
TD0       1

===== CHANNEL f1 =====
NUC1     13C
P1       10.30 usec
PL1      -1.00 dB
SFO1     100.6233329 MHz

===== CHANNEL f2 =====
CPDPRG2  waltz16
NUC2     1H
PCPD2    100.00 usec
PL2      -3.00 dB
PL12     16.00 dB
SFO2     400.1316005 MHz

F2 - Processing parameters
SI       32768
SF       100.6127700 MHz
WDW      EM
SSB      0
GB       1.00 Hz
PC       1.40
    
```

<sup>1</sup>H NMR: (R,E)-4-((1R,2R,3aS,6aS)-2-(tert-butyl dimethylsilyloxy)-5-(5-(4-methoxybenzyloxy)pentyl)-1,2,3,3a,6,6a-hexahydropentalen-1-yl)-1-m-tolylbut-3-en-2-ol

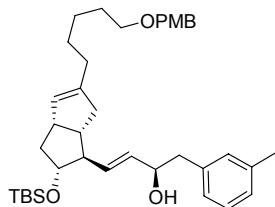

**(R,E)-4-((1R,2R,3aS,6aS)-2-(tert-butyl dimethylsilyloxy)-5-(5-(4-methoxybenzyloxy)pentyl)-1,2,3,3a,6,6a-hexahydropentalen-1-yl)-1-m-tolylbut-3-en-2-ol**

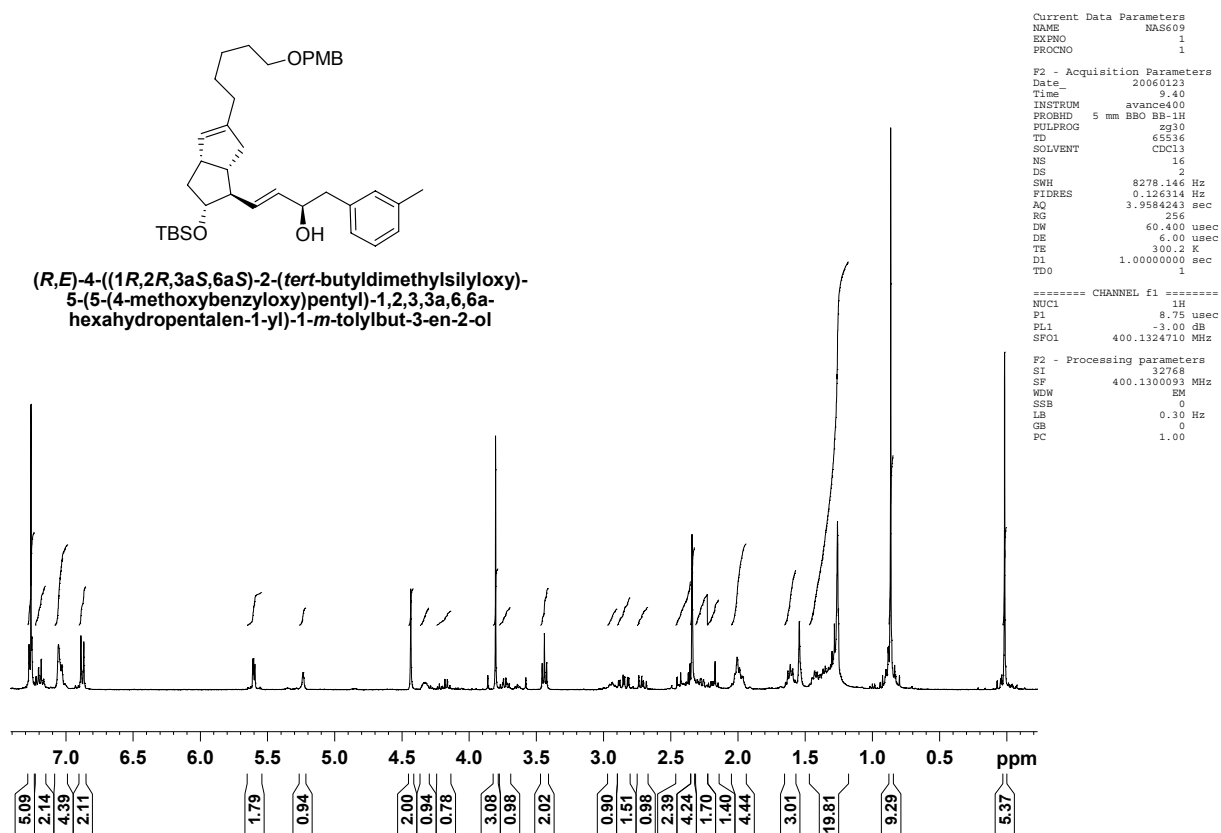

```

Current Data Parameters
NAME      NAS609
EXPNO    1
PROCNO   1

F2 - Acquisition Parameters
Date_    20060123
Time     9.40
INSTRUM  avance00
PROBHD   5 mm BBO BB-1H
PULPROG  zg30
TD       65536
SOLVENT  CDCl3
NS       16
DS       2
SWH      8278.146 Hz
FIDRES   0.126314 Hz
AQ       3.9584243 sec
RG       256
DW       60.400 usec
DE       6.00 usec
TE       300.2 K
D1       1.00000000 sec
TDO      1

===== CHANNEL f1 =====
NUC1     1H
P1       8.75 usec
PL1      -3.00 dB
SFO1    400.1324710 MHz

F2 - Processing parameters
SI       32768
SF       400.1300093 MHz
WDW      EM
SSB      0
LB       0.30 Hz
GB       0
PC       1.00
    
```

<sup>1</sup>H and <sup>13</sup>C NMR: *tert*-butyl((*S,E*)-1-((1*R,2R,3aS,6aS*)-2-(*tert*-butyldimethylsilyloxy)-5-(5-(4-methoxybenzyloxy)pentyl)-1,2,3,3*a*,6,6*a*-hexahydropentalen-1-yl)oct-1-en-3-yloxy)dimethylsilane (15)

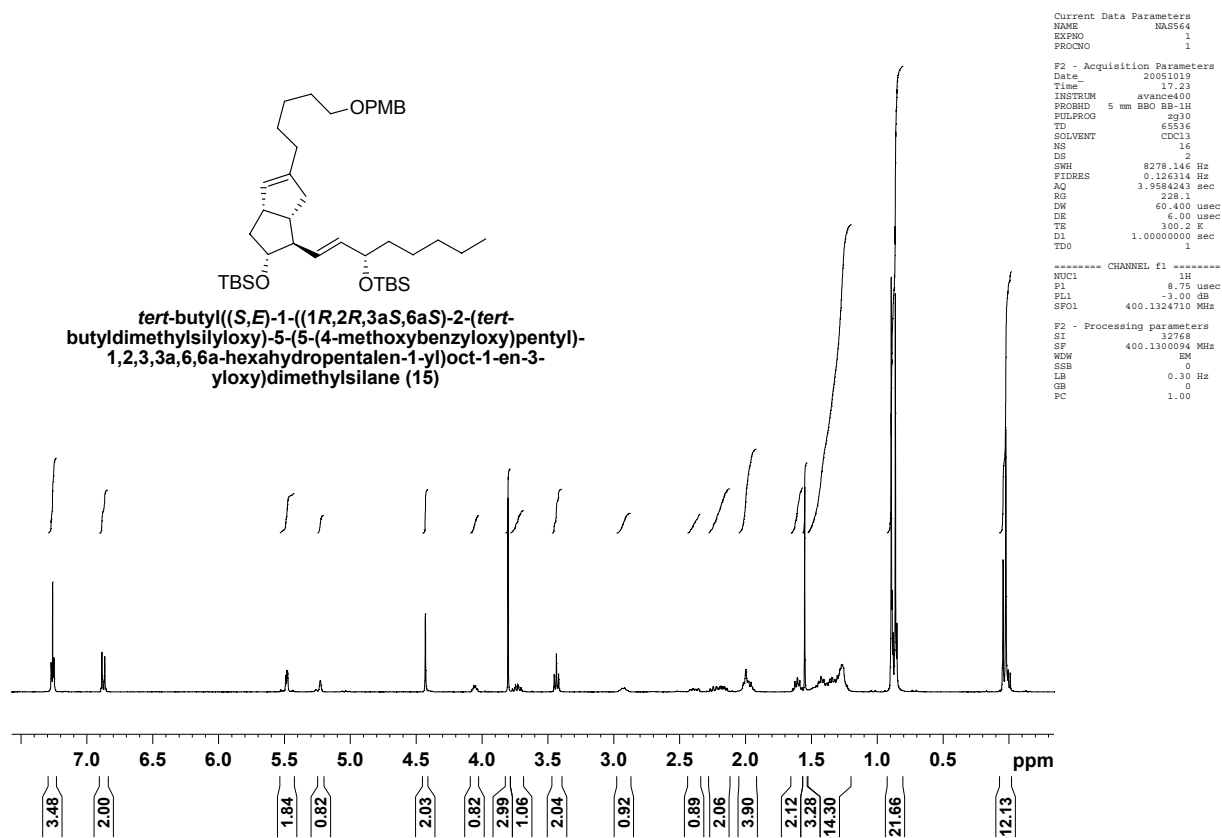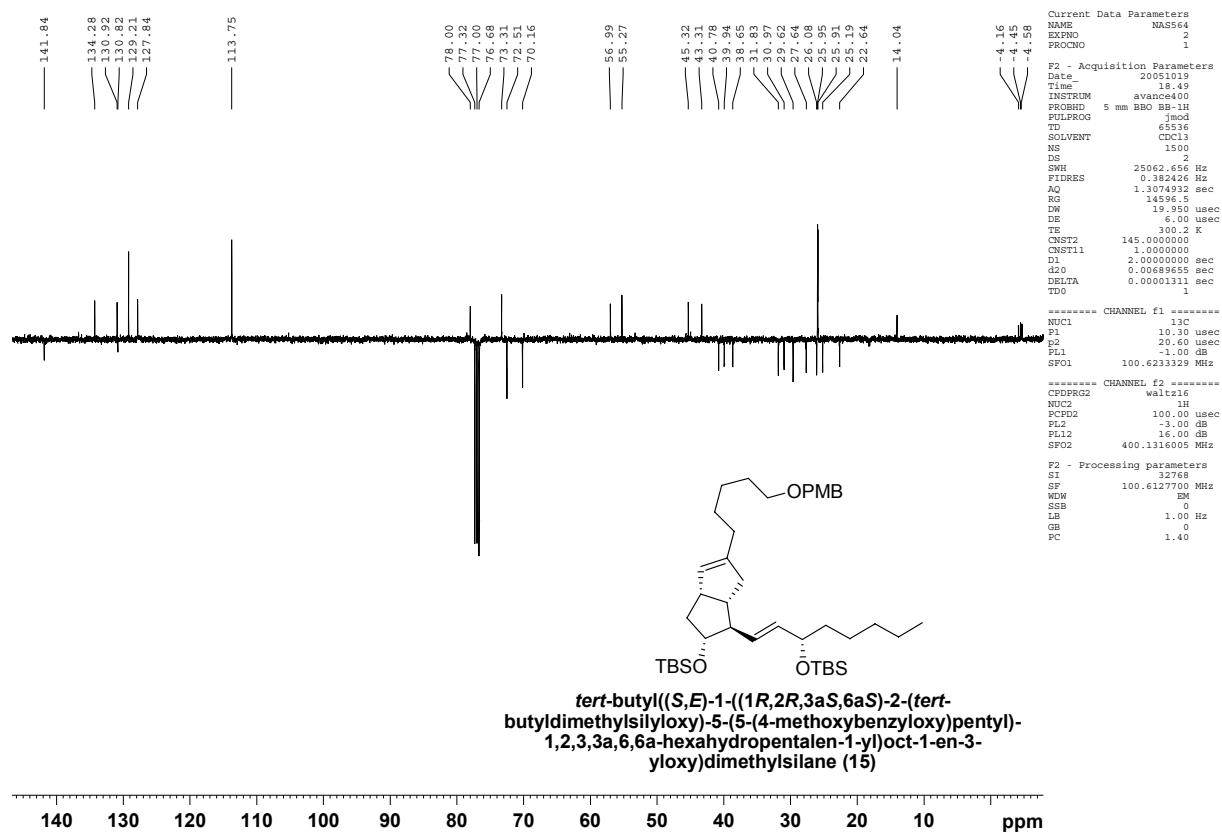



$^1\text{H}$  and  $^{13}\text{C}$  NMR: *tert*-butyl((1*R*,2*R*,3*aS*,6*aS*)-1-((*R,E*)-3-(*tert*-butyldimethylsilyloxy)-4-*m*-tolylbut-1-enyl)-5-(5-(4-methoxybenzyloxy)pentyl)-1,2,3,3*a*,6,6*a*-hexahydropentalen-2-yloxy)dimethylsilane (16)

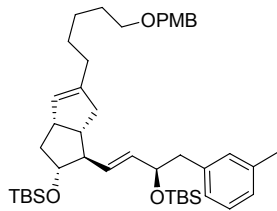

*tert*-butyl((1*R*,2*R*,3*aS*,6*aS*)-1-((*R,E*)-3-(*tert*-butyldimethylsilyloxy)-4-*m*-tolylbut-1-enyl)-5-(5-(4-methoxybenzyloxy)pentyl)-1,2,3,3*a*,6,6*a*-hexahydropentalen-2-yloxy)dimethylsilane (16)

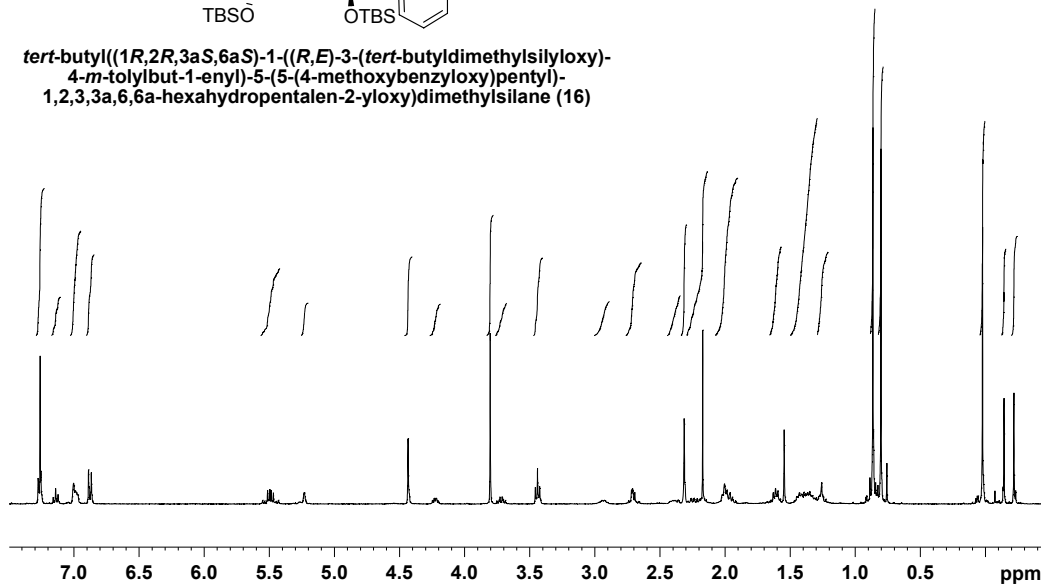

```

Current Data Parameters
NAME      NMS447.01
EXPNO    1
PROCNO   1

F2 - Acquisition Parameters
Date_    20050218
Time     8.08
INSTRUM  avance400
PROBHD   5 mm BBO BB-1H
PULPROG  zgpg30
TD        65536
SOLVENT  CDCl3
NS        16
DS        2
SWH       9278.144 Hz
FIDRES    0.126314 Hz
AQ        3.9584243 sec
RG        456.1
DW        60.400 usec
DE        6.00 usec
TE        300.0 K
D1        1.00000000 sec

===== CHANNEL f1 =====
NUC1      1H
P1        8.75 usec
PL1       -1.00 dB
SFO1      400.1324710 MHz

F2 - Processing Parameters
SI        32768
SF        400.1300093 MHz
WDW       EM
SSB       0
LB        0.30 Hz
GB        0
PC        1.00
    
```

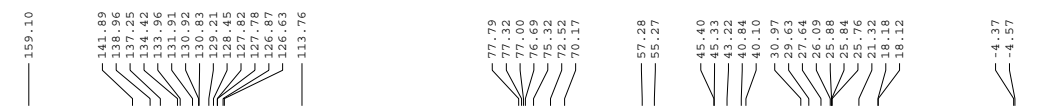

```

Current Data Parameters
NAME      NMS447.01
EXPNO    2
PROCNO   1

F2 - Acquisition Parameters
Date_    20050221
Time     13.07
INSTRUM  avance400
PROBHD   5 mm BBO BB-1H
PULPROG  zgpg30
TD        65536
SOLVENT  CDCl3
NS        3741
DS        2
SWH       25062.656 Hz
FIDRES    0.382426 Hz
AQ        1.3074932 sec
RG        16384
DW        19.950 usec
DE        6.00 usec
TE        300.0 K
D1        1.00000000 sec
D2        2.00000000 sec
d13       0.00000100 sec
d20       0.00689655 sec
DELTA     0.00001311 sec

===== CHANNEL f1 =====
NUC1      13C
P1        10.30 usec
P2        20.60 usec
PL1       -1.00 dB
PL2       -1.00 dB
SFO1      100.6232933 MHz

===== CHANNEL f2 =====
CPDPRG2  waltz16
NUC2      1H
PCPD2    100.00 usec
PL2      -3.00 dB
PL12     16.00 dB
SFO2     400.1316005 MHz

F2 - Processing Parameters
SI        32768
SF        100.6127698 MHz
WDW       EM
SSB       0
LB        1.00 Hz
GB        0
PC        1.40
    
```

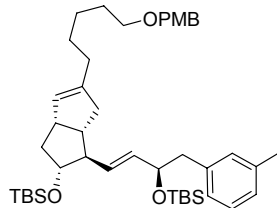

*tert*-butyl((1*R*,2*R*,3*aS*,6*aS*)-1-((*R,E*)-3-(*tert*-butyldimethylsilyloxy)-4-*m*-tolylbut-1-enyl)-5-(5-(4-methoxybenzyloxy)pentyl)-1,2,3,3*a*,6,6*a*-hexahydropentalen-2-yloxy)dimethylsilane (16)

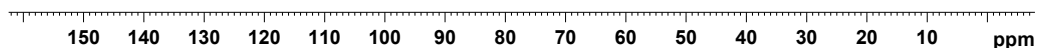

$^1\text{H}$  and  $^{13}\text{C}$  NMR: 5-((3*aS*,5*R*,6*R*,6*aS*)-5-hydroxy-6-((*S*,*E*)-3-hydroxyoct-1-enyl)-1,3*a*,4,5,6,6*a*-hexahydropentalen-2-yl)pentanoic acid (Isocarbacyclin), 2

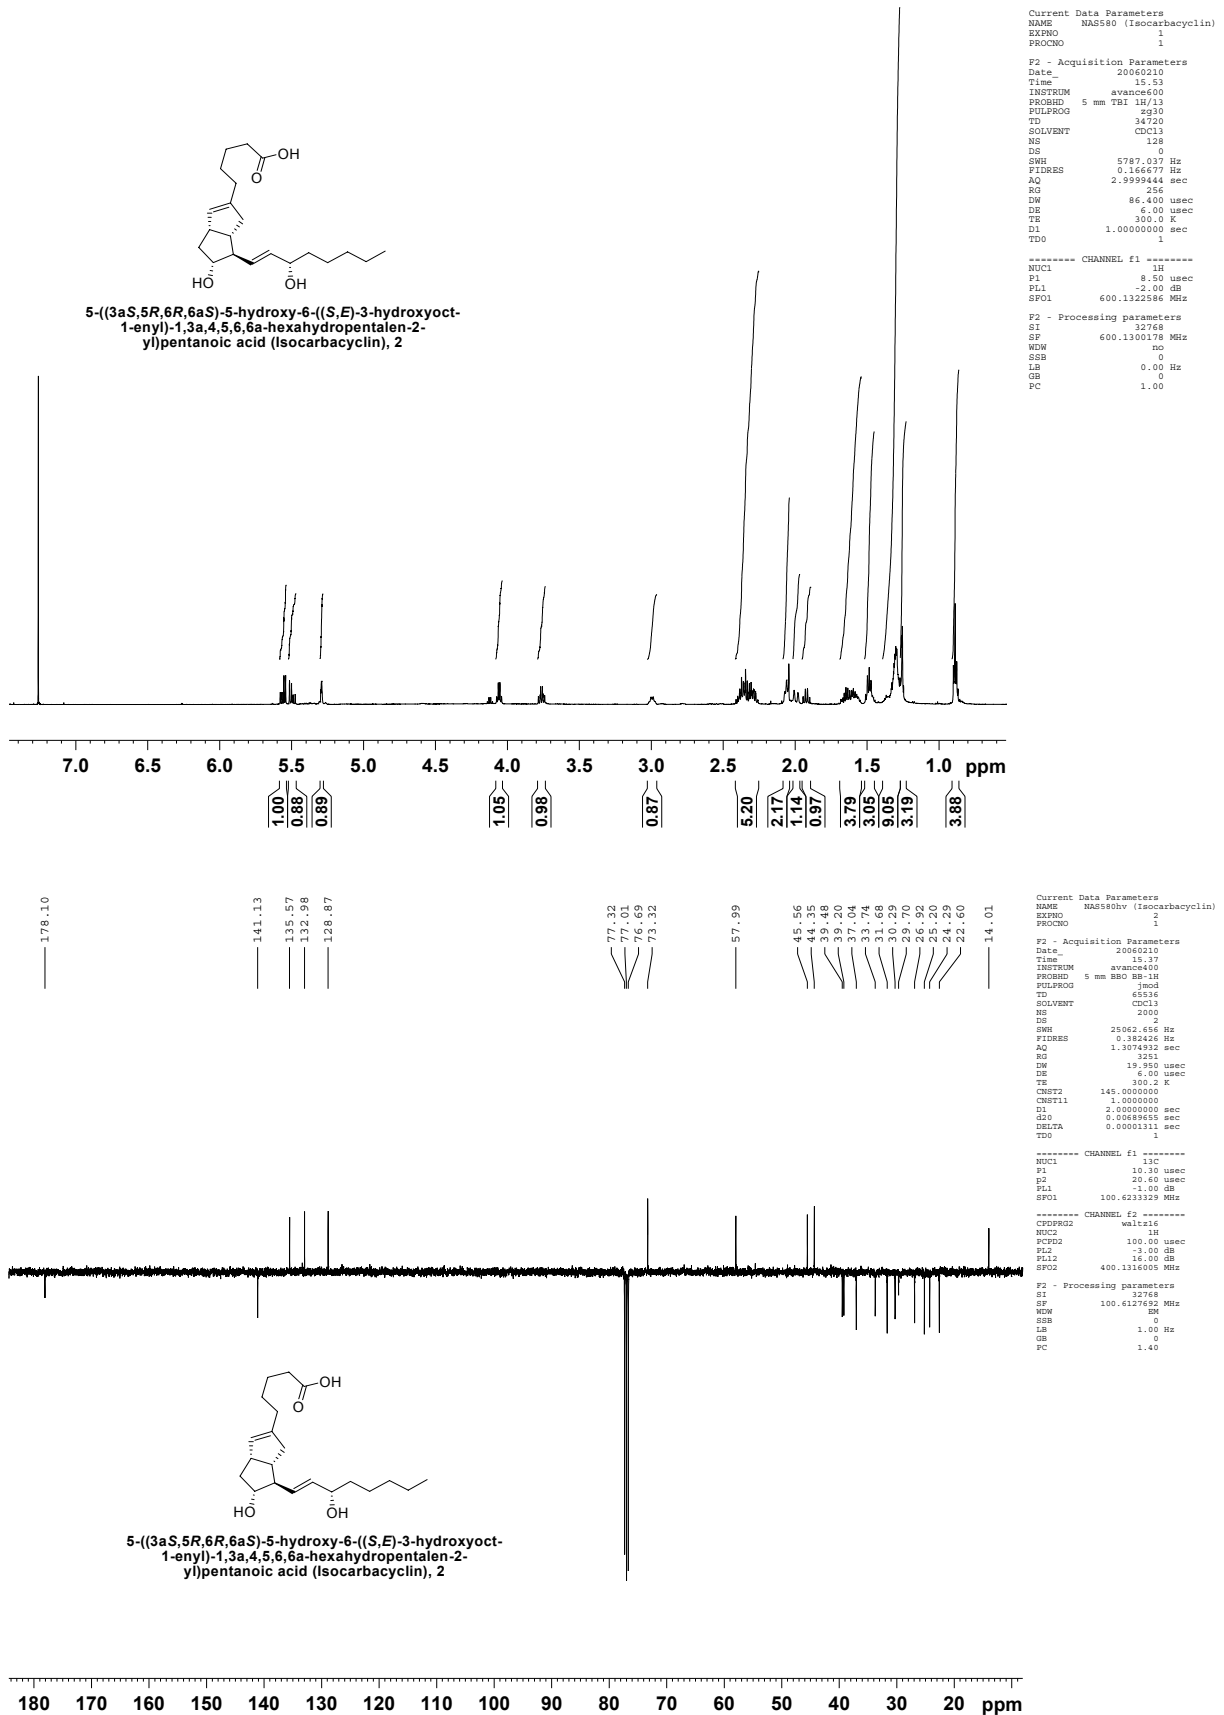

<sup>1</sup>H and <sup>13</sup>C NMR: 5-((3*aS*,5*R*,6*R*,6*aS*)-5-hydroxy-6-((*R,E*)-3-hydroxy-4-*m*-tolylbut-1-enyl)-1,3*a*,4,5,6,6*a*-hexahydropentalen-2-yl)pentanoic acid (15*R*-TIC), 3

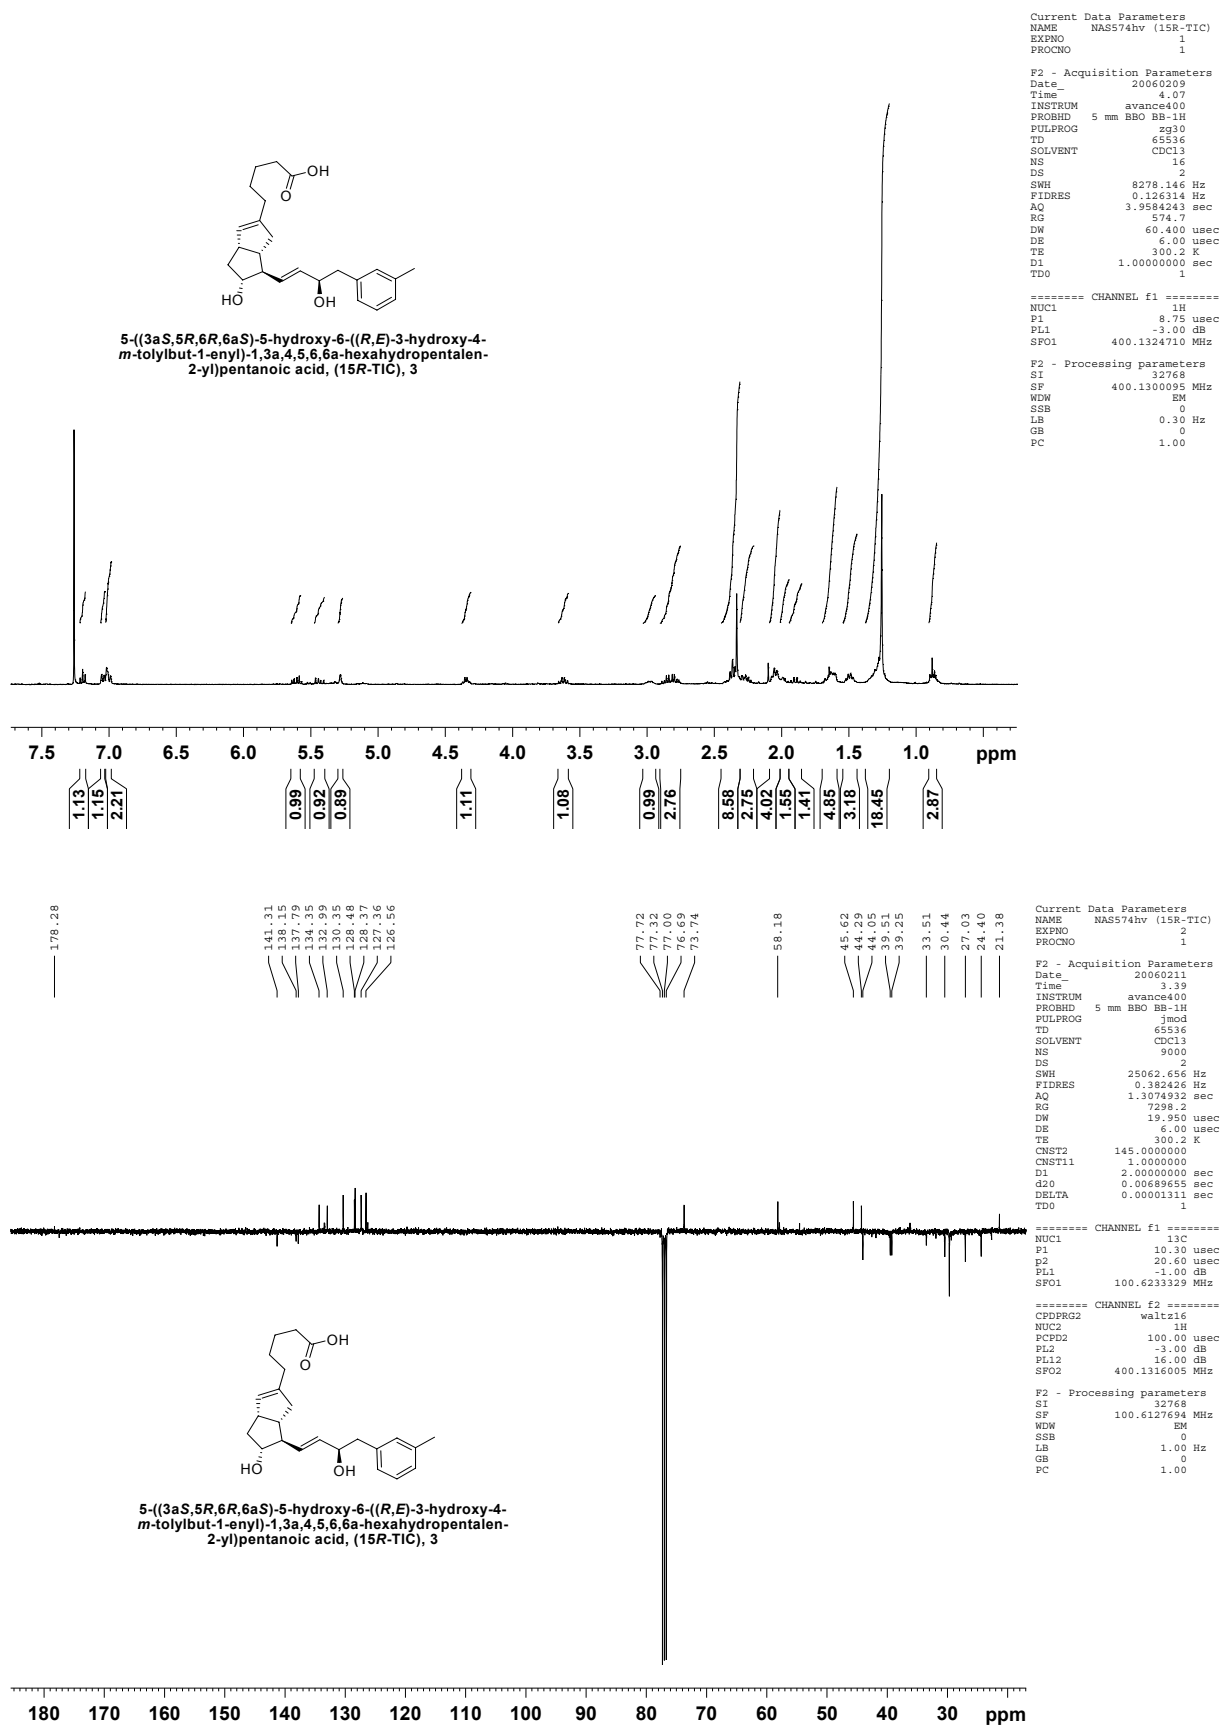

Supplement: b611339g.pdf [file b611339g.pdf]
